# Supplementary material
Source: publisher figshare collection journal article supplement (https://acs.figshare.com/ndownloader/files/12393560)

## Supporting Information

# **Radical Addition Cascade Cyclization of 1,6-Enynes with DMSO to Access Methylsulfonylated and Carbonylated Benzofurans under Transition-Metal-Free Conditions**

Jie Zhang, Shijing Cheng, Zhiqiang Cai, Ping Liu\*, and Peipei Sun\*

*School of Chemistry and Materials Science, Jiangsu Provincial Key Laboratory of Material  
Cycle Processes and Pollution Control, Jiangsu Collaborative Innovation Center of Biomedical*

*Functional Materials, Nanjing Normal University, Nanjing 210023, China*

*pingliu@njnu.edu.cn; sunpeipei@njnu.edu.cn*

## **Contents**

|                                                                                  |        |
|----------------------------------------------------------------------------------|--------|
| 1. The control experiments.....                                                  | S1-S3  |
| 2. <sup>1</sup> H and <sup>13</sup> C NMR spectra of the products <b>2</b> ..... | S4-S34 |

## 1. The control experiments

### 1.1. Free radical-trapping experiment A

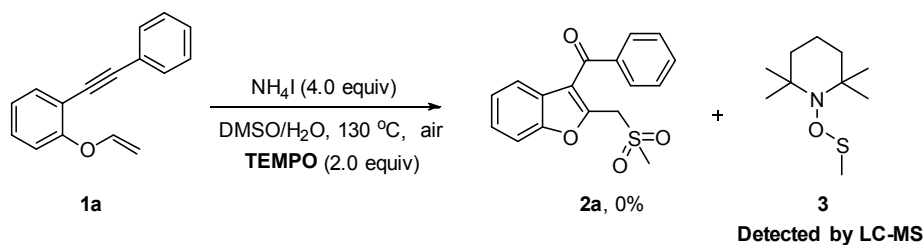

To a sealed tube were added 1,6-enyne **1a** (0.2 mmol, 1.0 equiv),  $\text{NH}_4\text{I}$  (0.8 mmol, 4.0 equiv), **TEMPO** (0.4 mmol, 2.0 equiv),  $\text{DMSO}$  (1.6 mL) and  $\text{H}_2\text{O}$  (0.4 mL). The reaction mixture was stirred at  $130\text{ }^\circ\text{C}$  for 24 h. After the reaction was stopped, no desired product **2a** was detected by TLC and LC-MS, indicating that the reaction was completely inhibited. Meanwhile, a methylthiyl radical ( $\text{MeS}\cdot$ ) trapping product **3** was observed through the LC-MS analysis of the reaction solution (Figure S1).

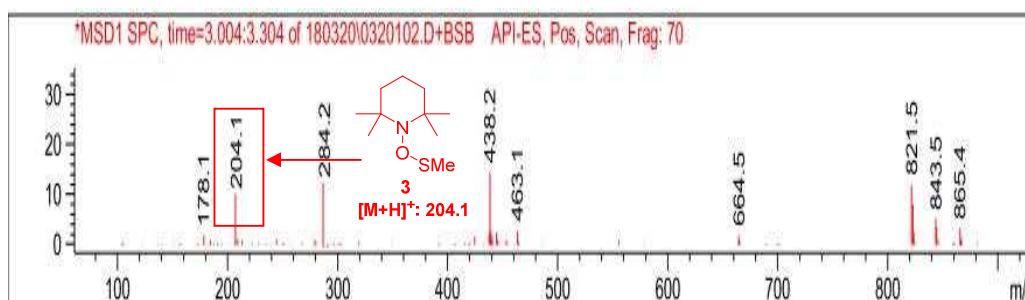

Figure S1. LC-MS analysis of the radical trapping product **3**.

### 1.2. Free radical-trapping experiment B

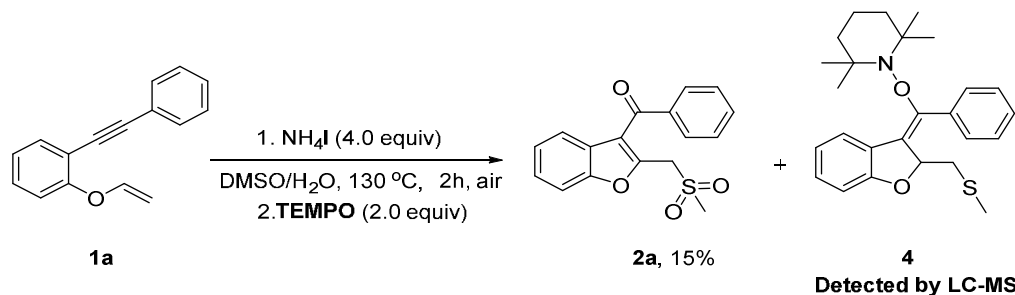

To a sealed tube were added 1,6-enyne **1a** (0.2 mmol, 1.0 equiv),  $\text{NH}_4\text{I}$  (0.8 mmol, 4.0 equiv),  $\text{DMSO}$  (1.6 mL) and  $\text{H}_2\text{O}$  (0.4 mL). The reaction mixture was stirred at  $130\text{ }^\circ\text{C}$  for 2 h and then **TEMPO** (0.4 mmol, 2.0 equiv) was added under air atmosphere. The reaction was continued for 12 h. After the reaction was stopped, the desired product **2a** was separated in 15% yields.

Meanwhile, a radical trapping product **4** was observed through LC-MS analysis of the reaction solution (Figure S2).

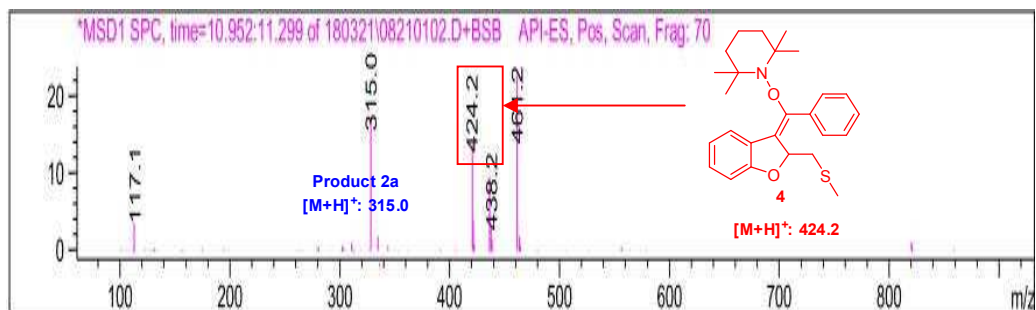

**Figure S2.** LC-MS analysis of the radical trapping product **4**.

### 1.3. The isotopic labeling experiments

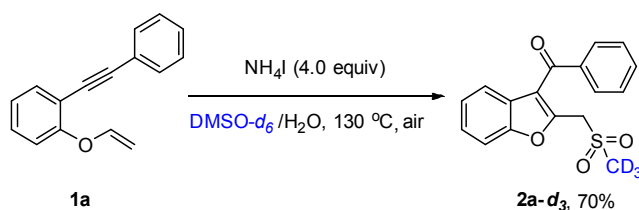

The isotopic labeling experiment was performed according to the general procedure for the preparation of **2a** except changing DMSO to DMSO- $d_6$ . The desired product **2a- $d_3$**  was obtained in 70% yield (Figure S3).

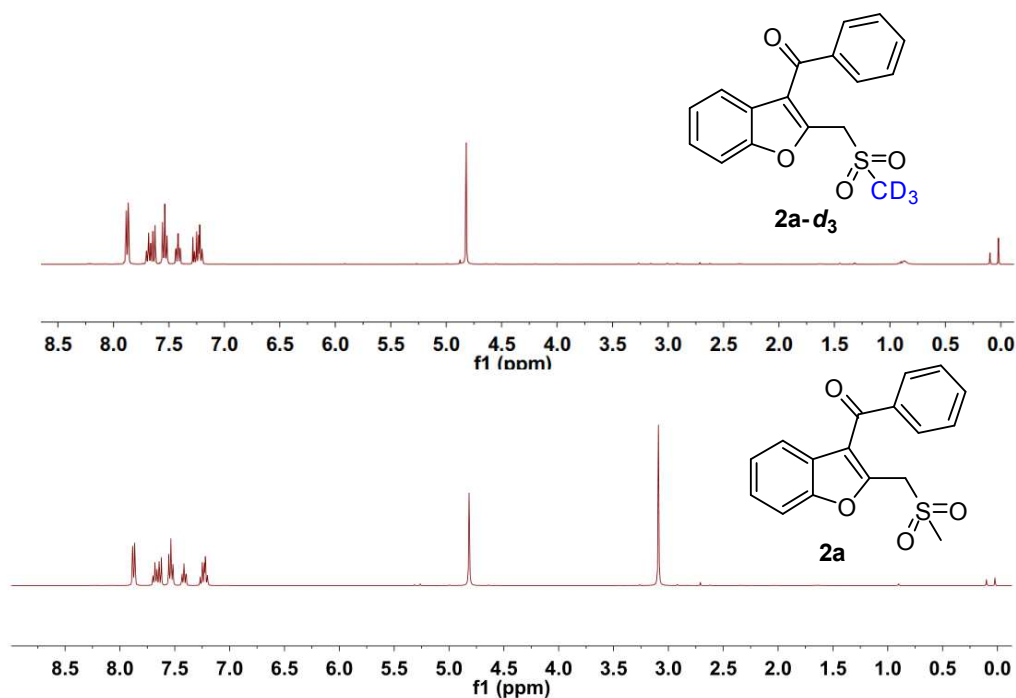

**Figure S3.**  $^1\text{H}$  NMR analysis of **2a** and **2a- $d_3$** .

#### 1.4. $\text{H}_2\text{O}^{18}$ -isotope labeling experiment

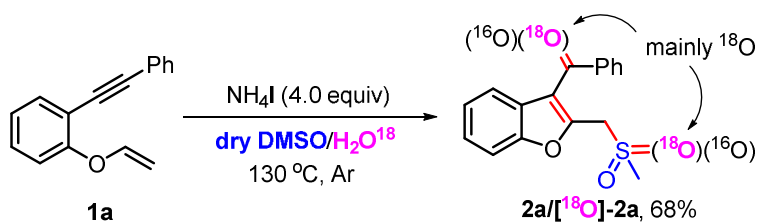

To identify the source of oxygen in product **2a**,  $^{18}\text{O}$ -labeling experiment was performed using  $\text{H}_2\text{O}^{18}$  under the standard condition, and the subsequent GC-MS analysis revealed that the  $^{18}\text{O}$ -labelled **2a** was the main product (Figure S4).

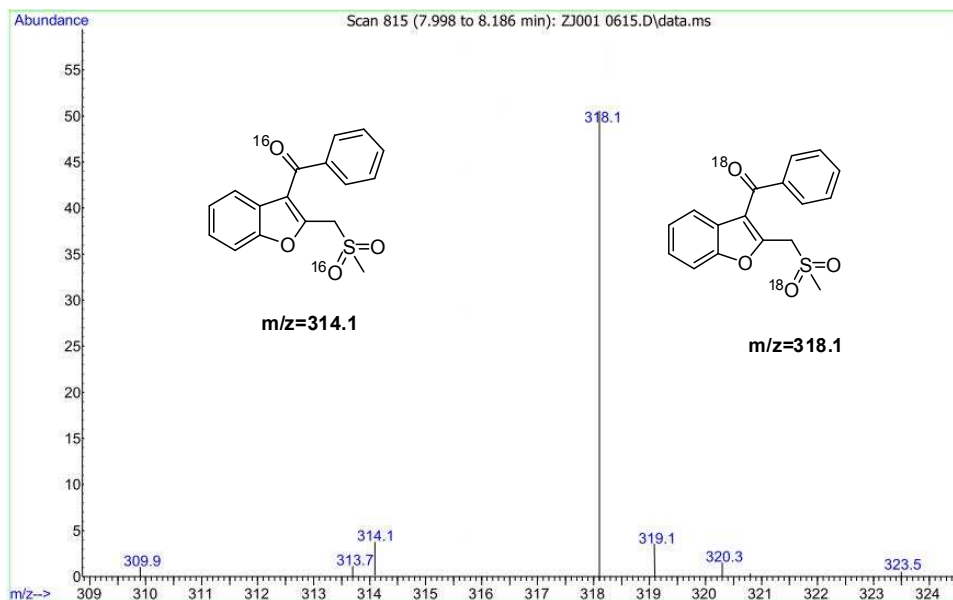

**Figure S4.** GC-MS analysis of  $^{18}\text{O}$ -labelled product **2a**.

## 2. $^1\text{H}$ and $^{13}\text{C}$ NMR spectra of the products 2

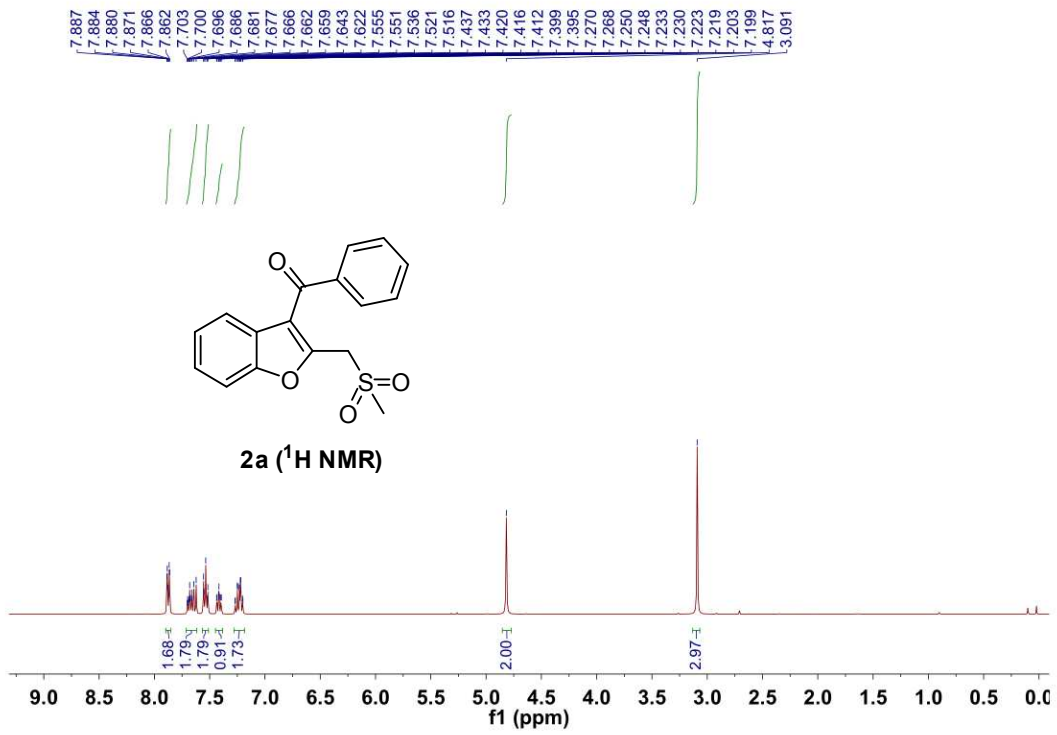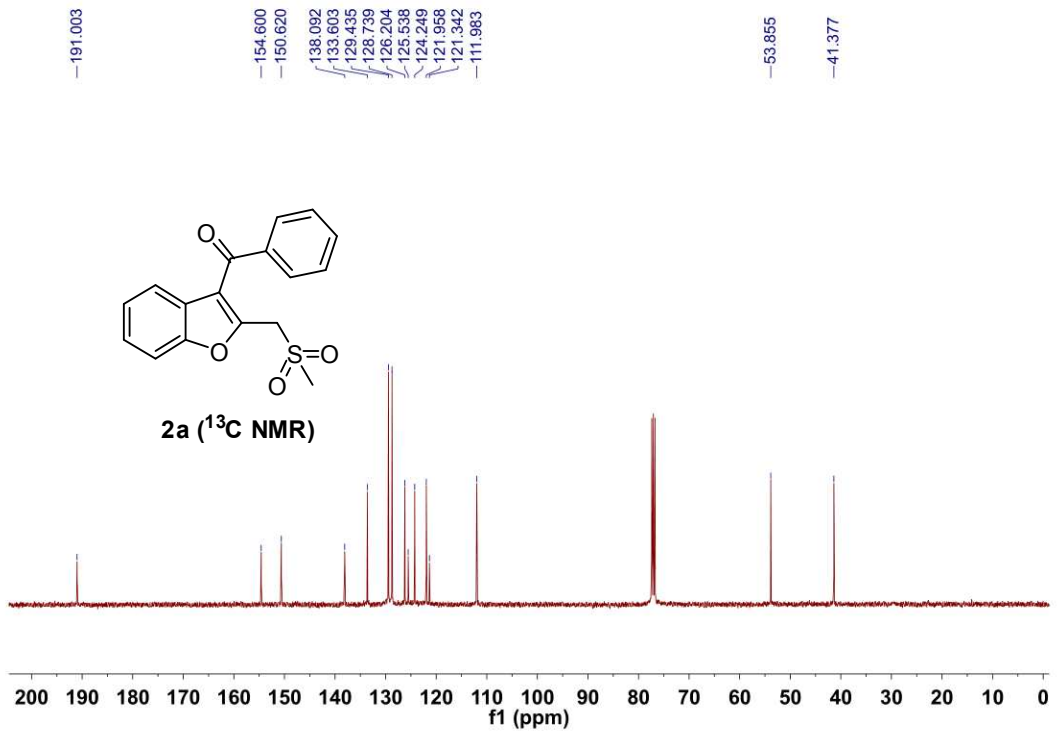

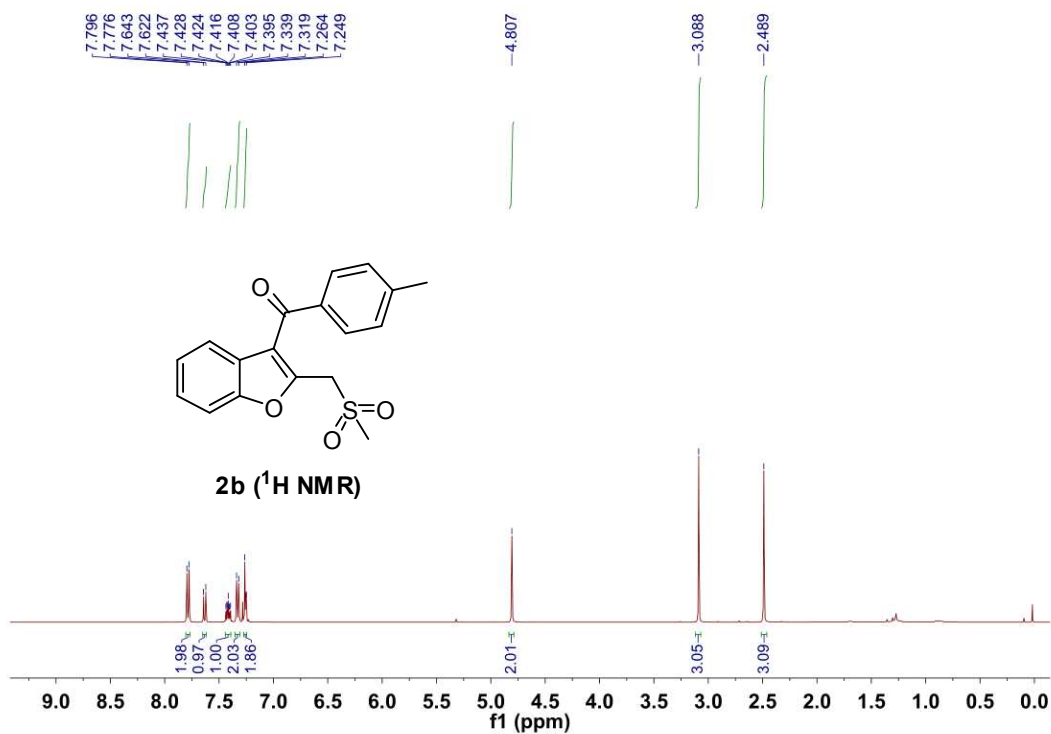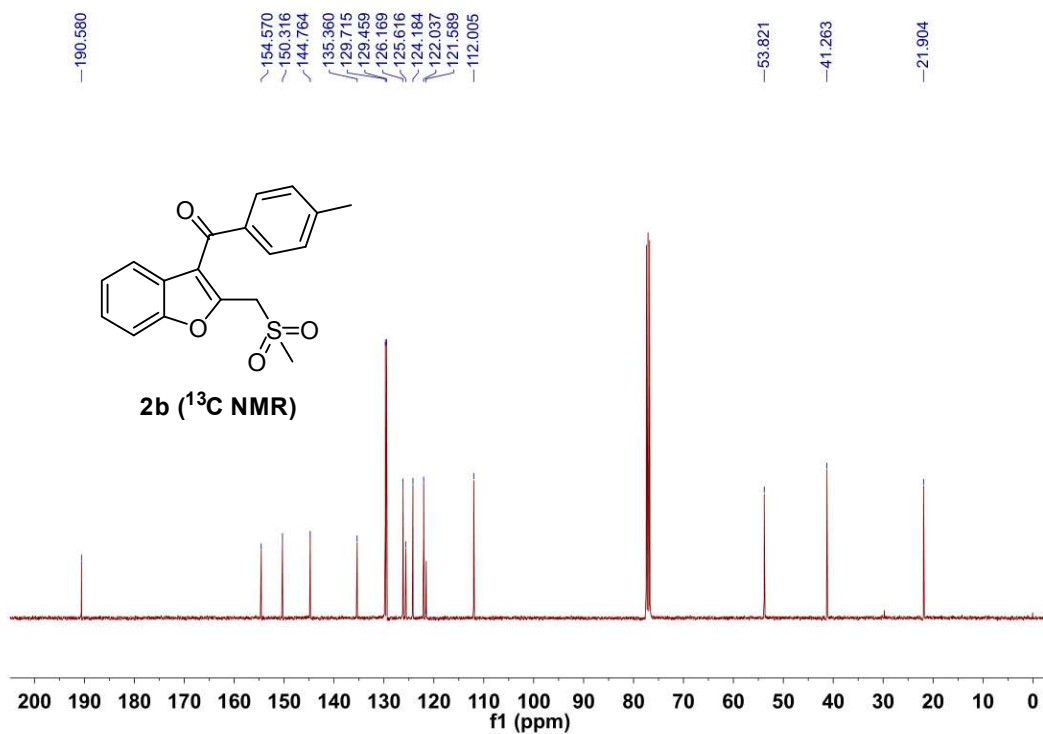

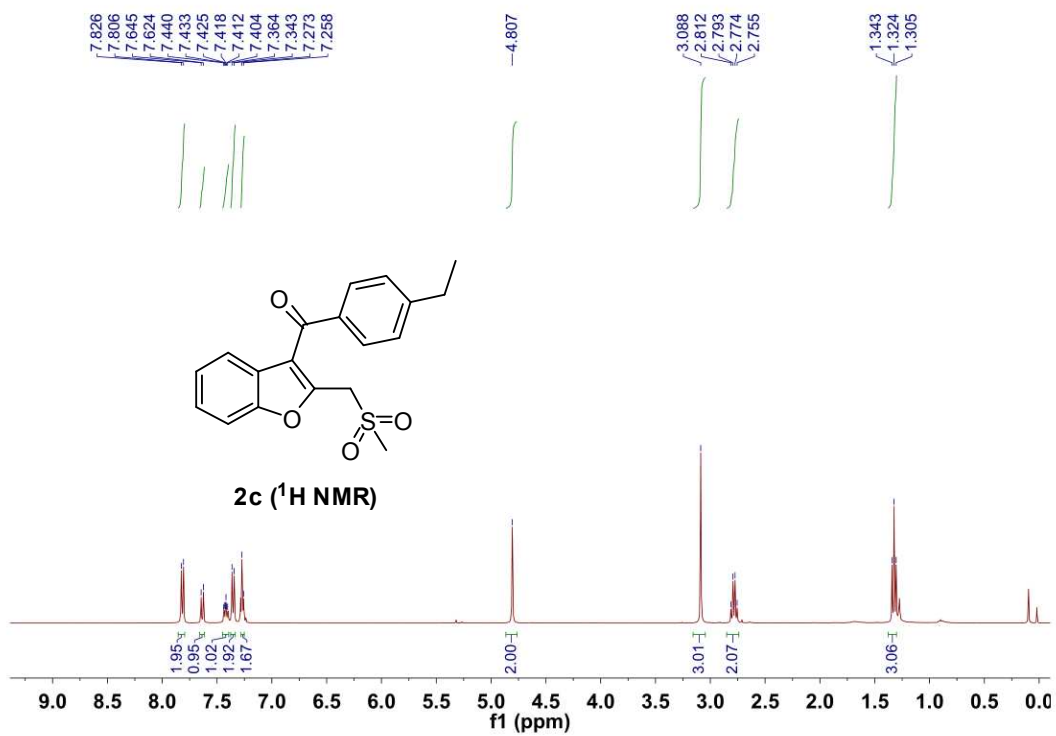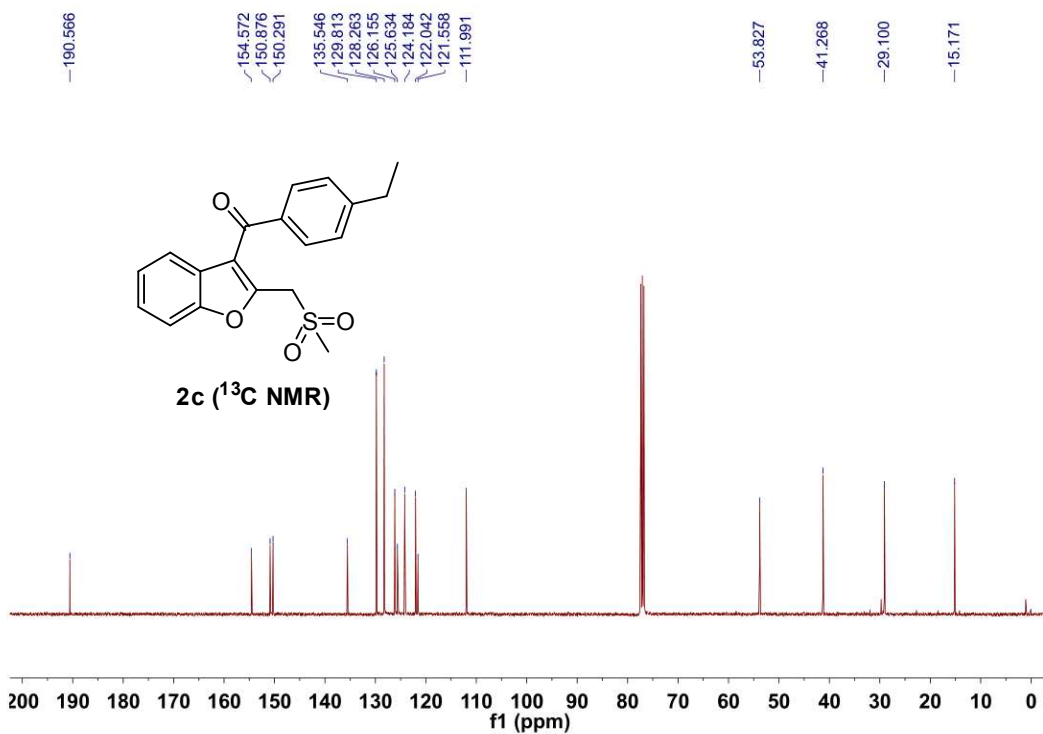

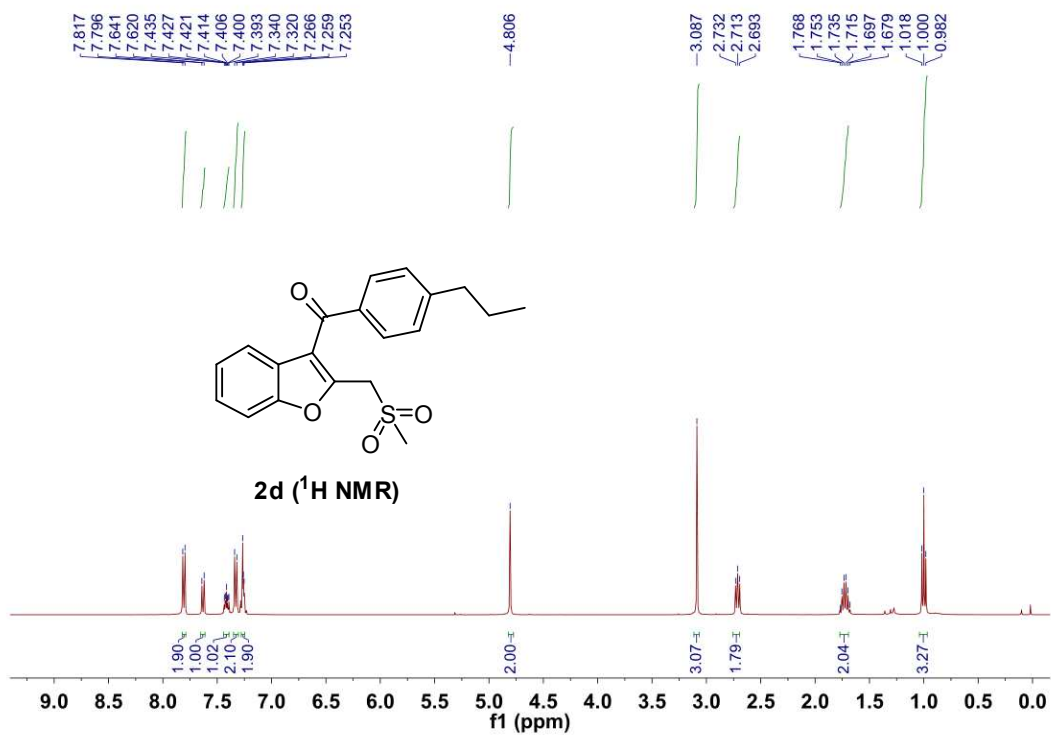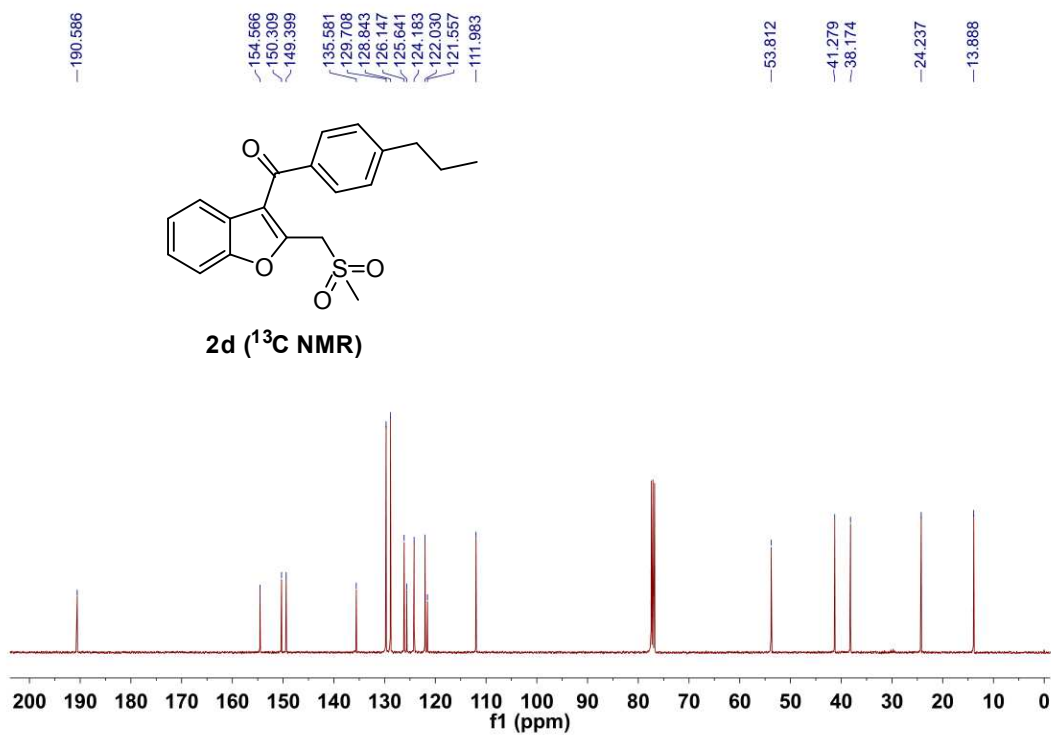



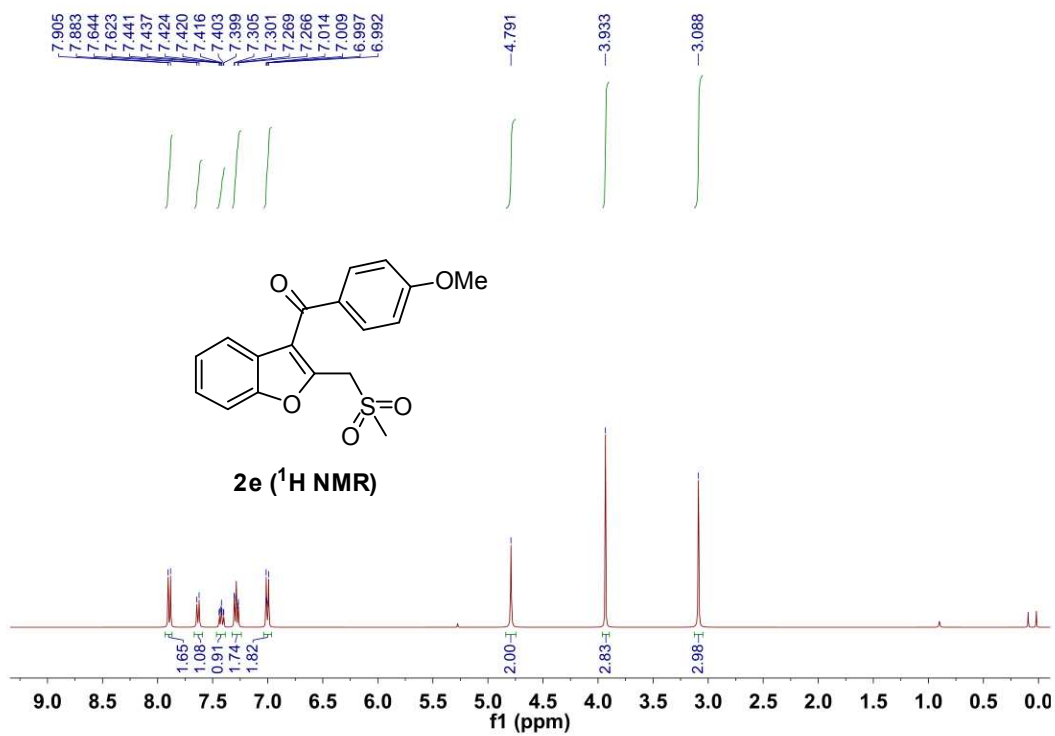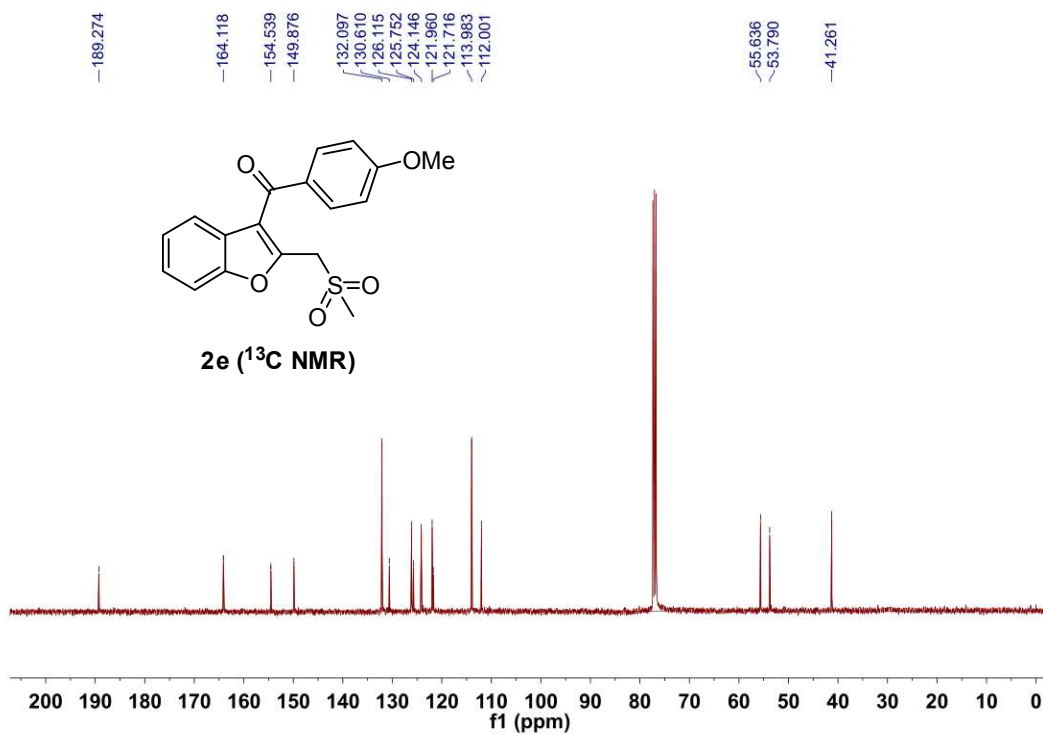

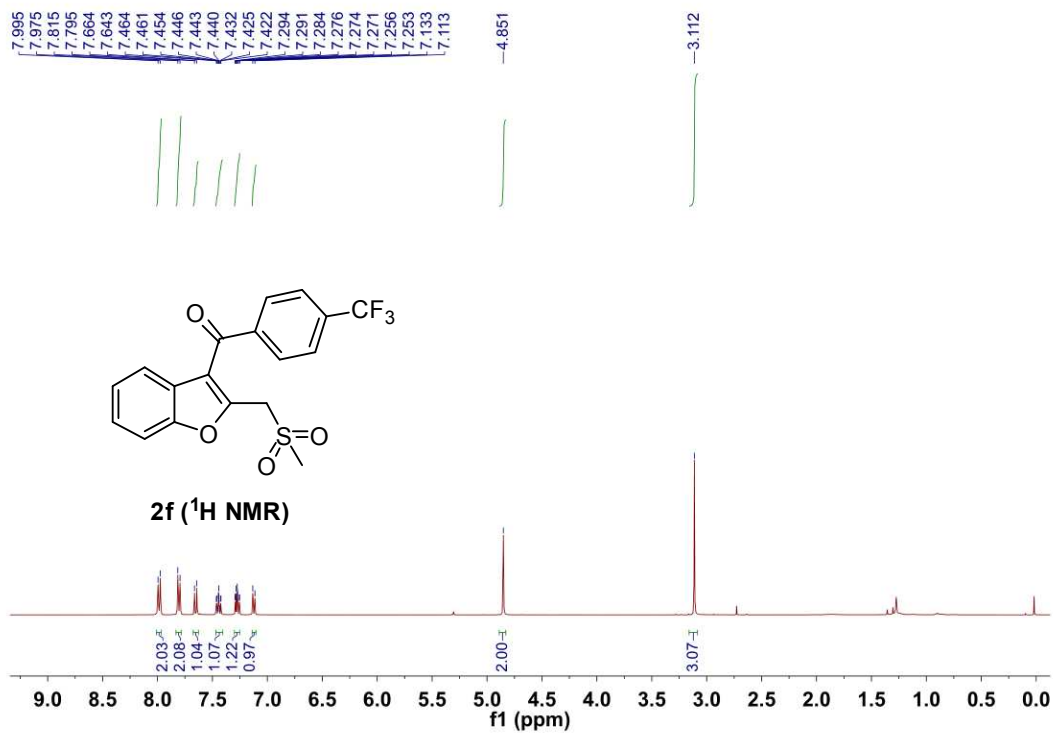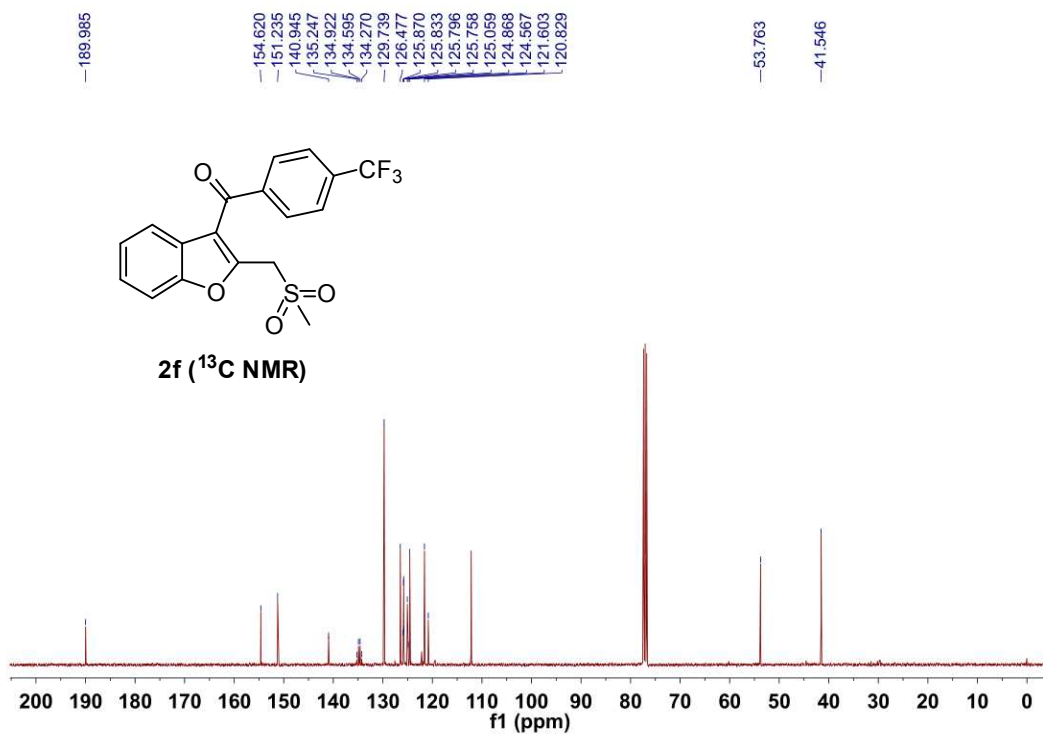

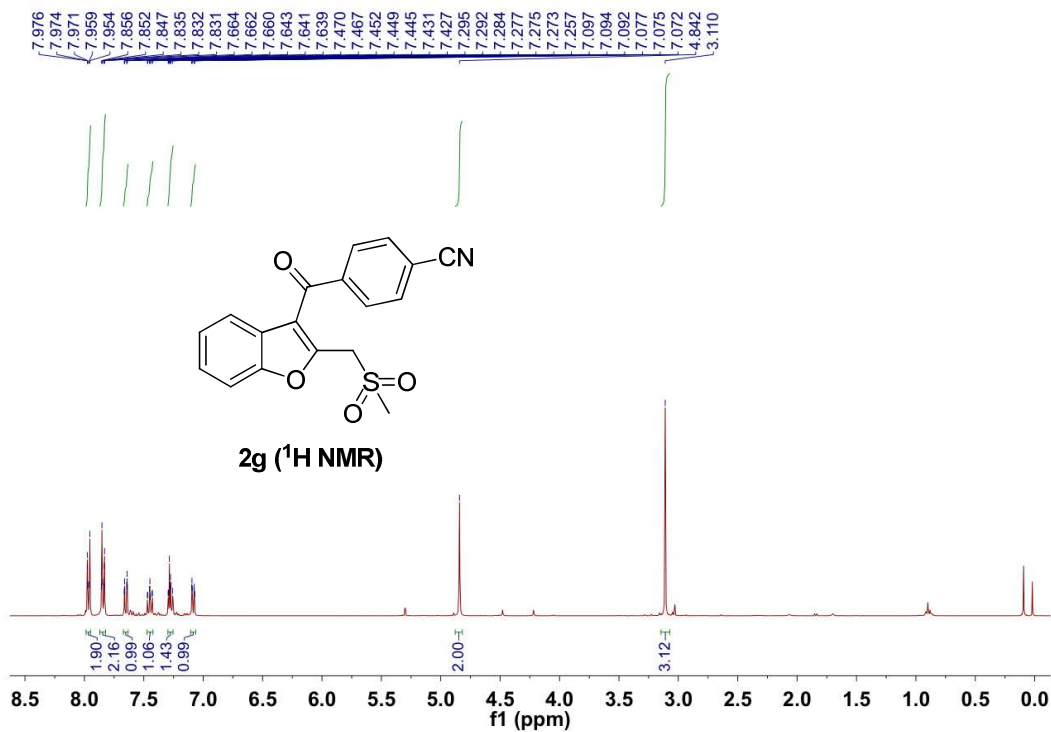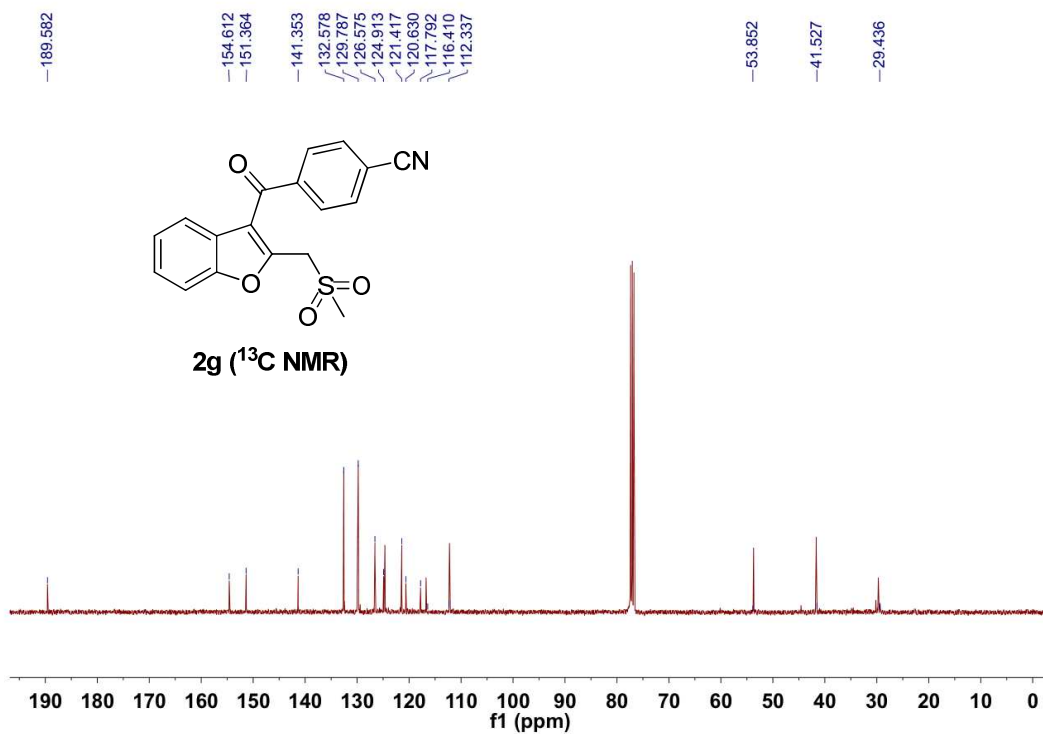

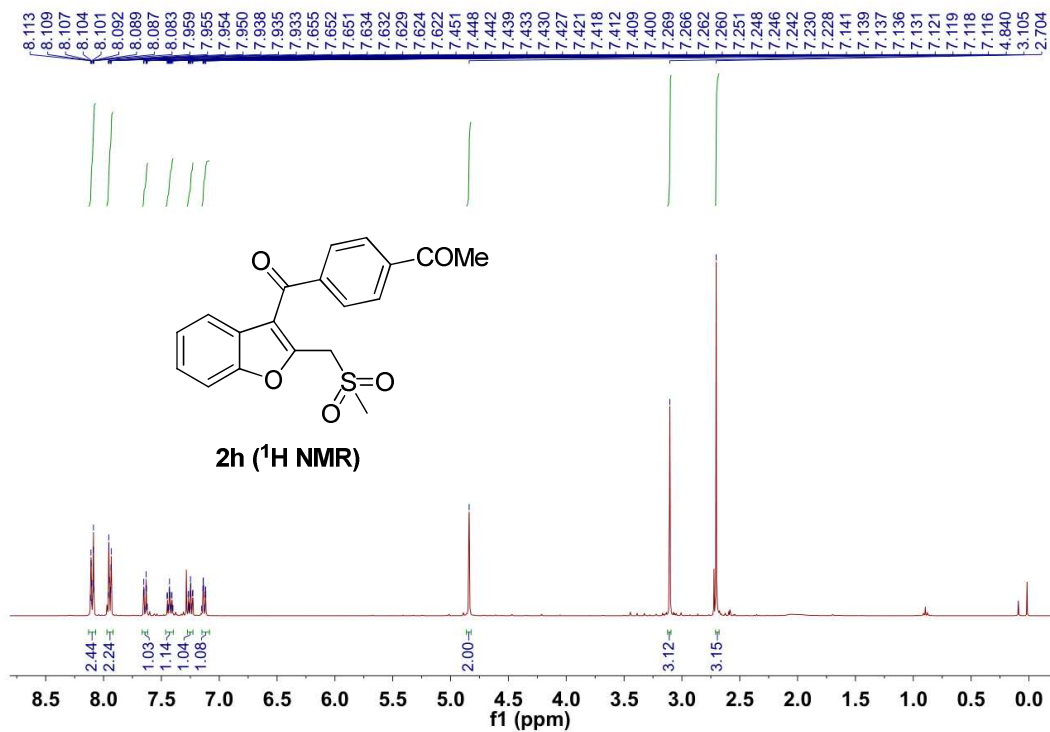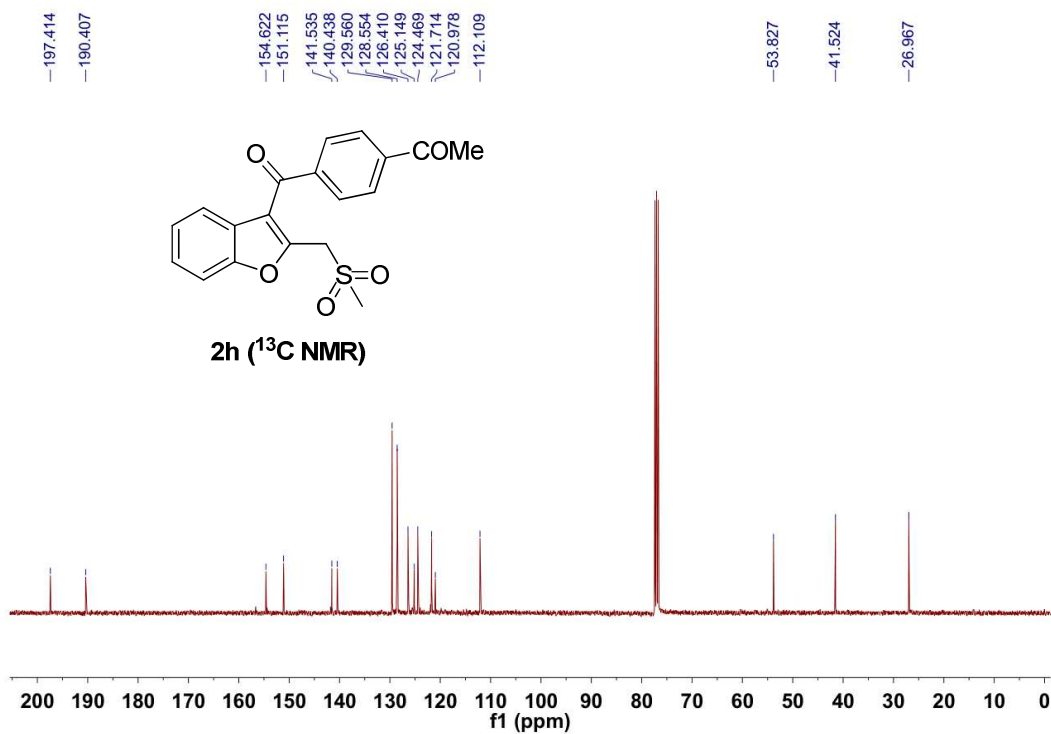

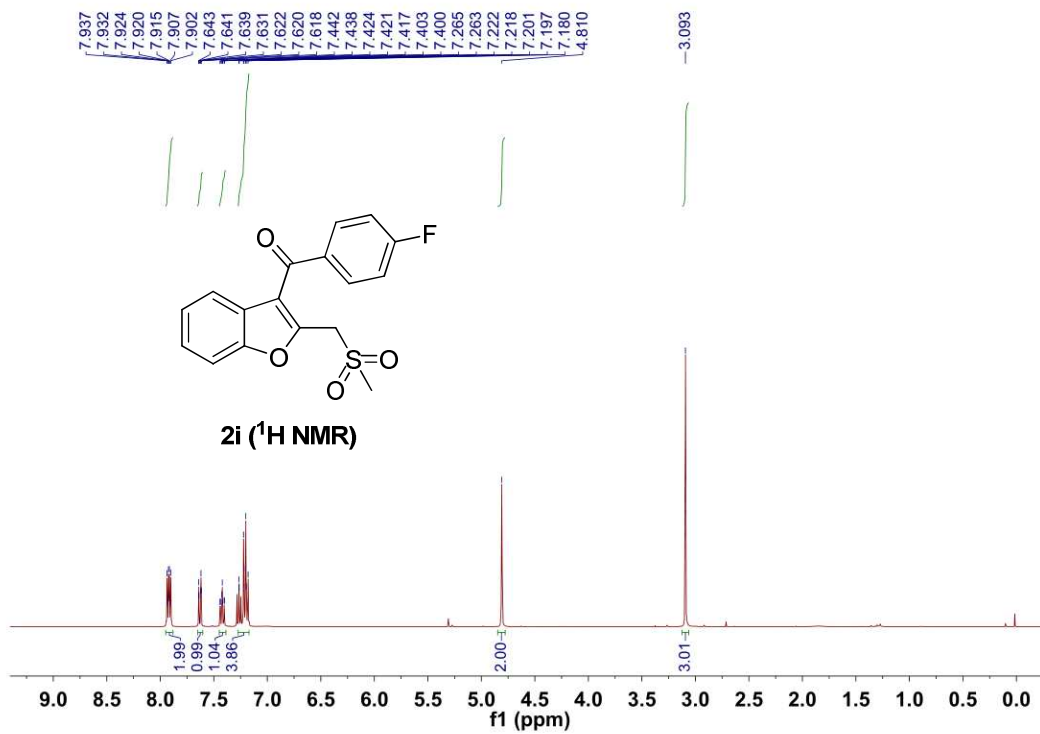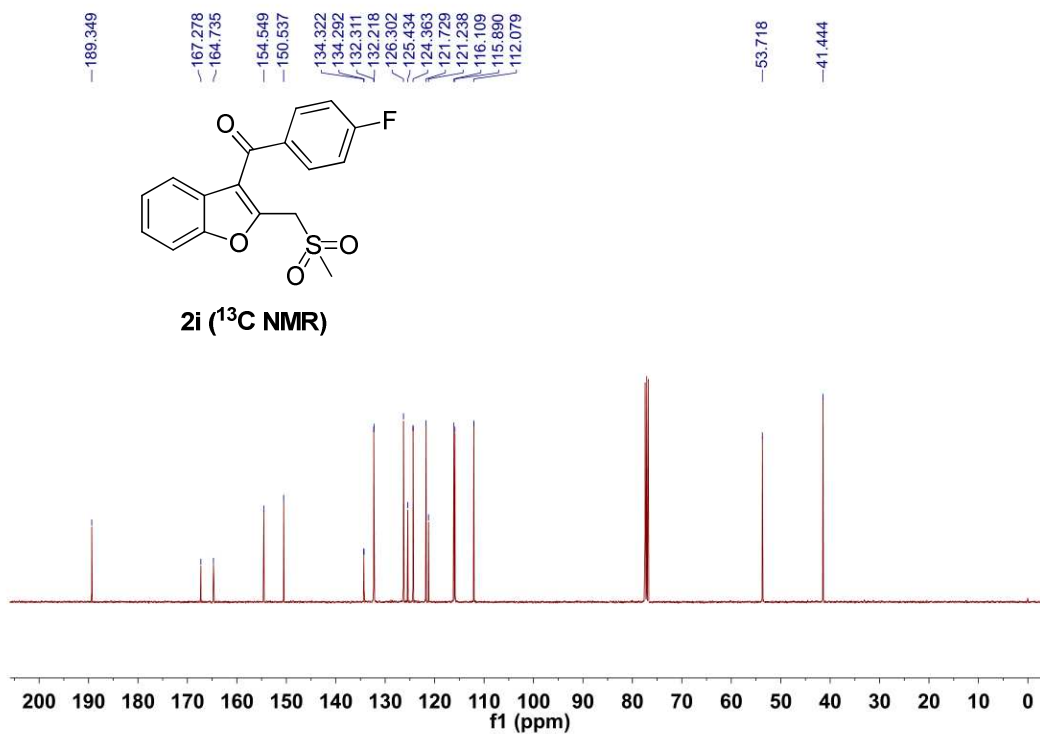

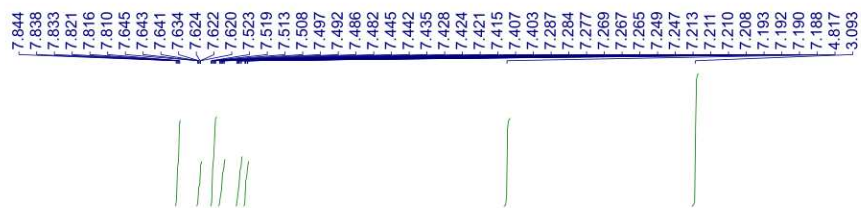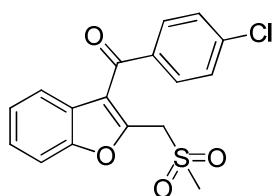

2j ( $^1\text{H}$  NMR)

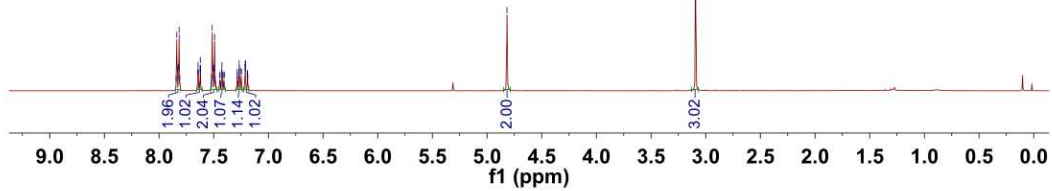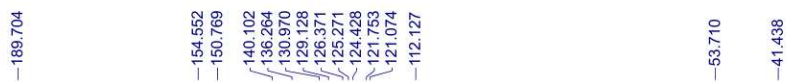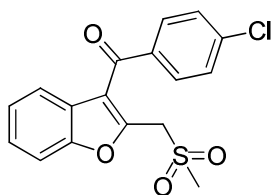

2j ( $^{13}\text{C}$  NMR)

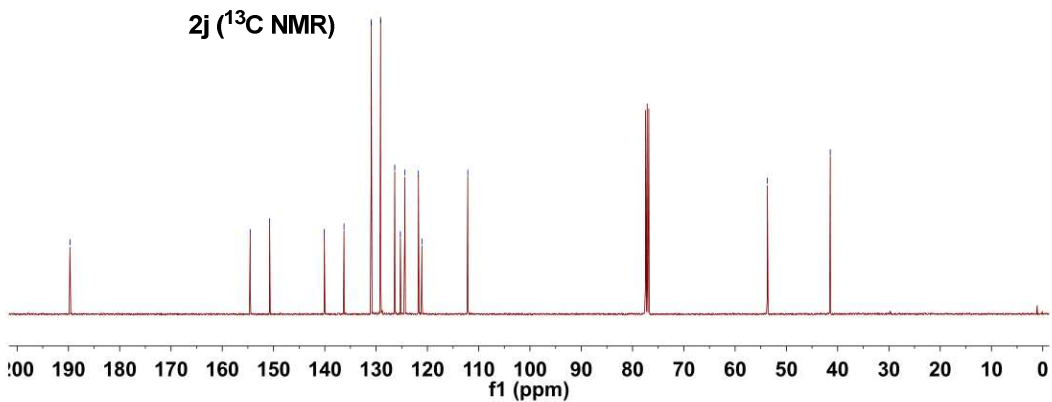

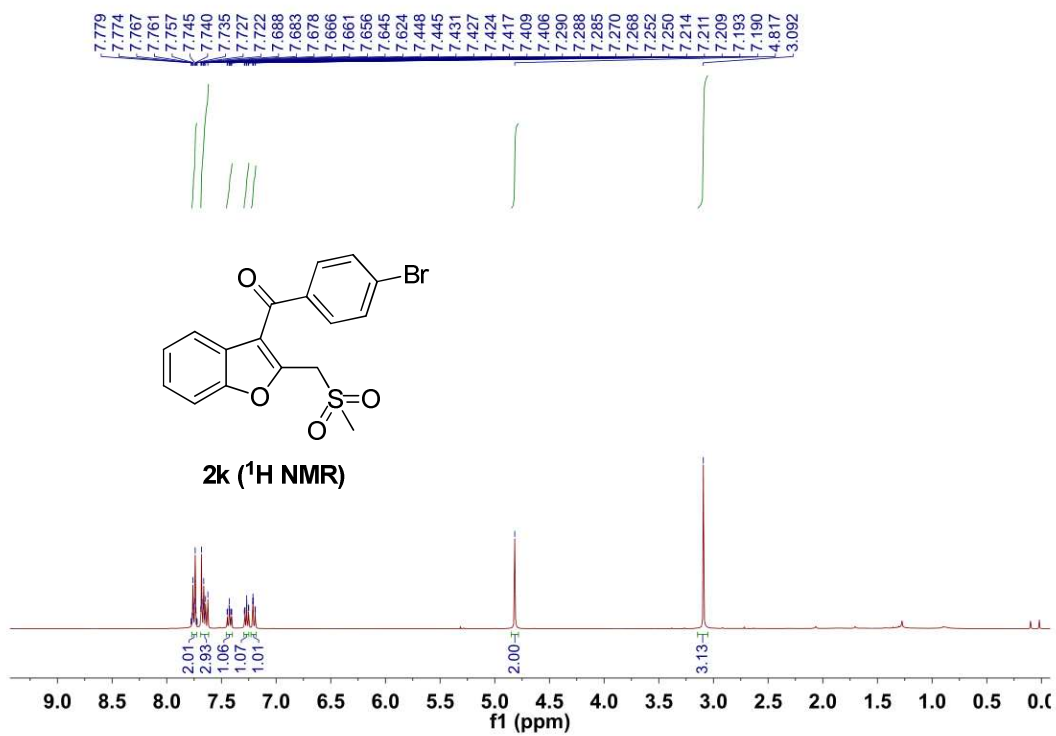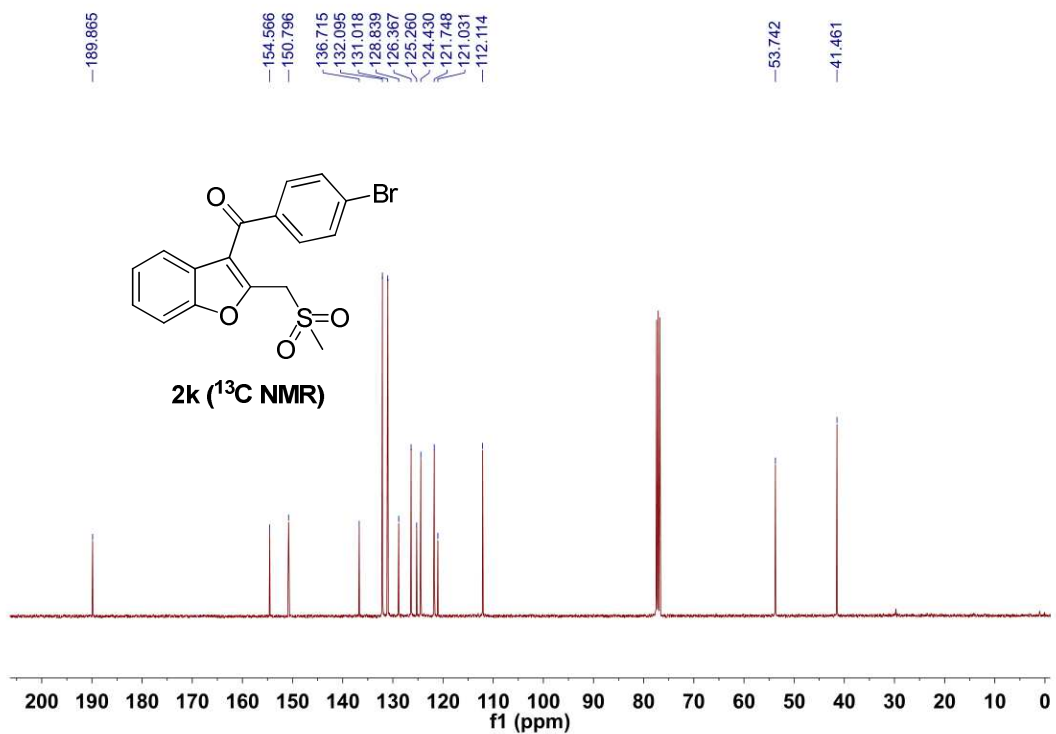

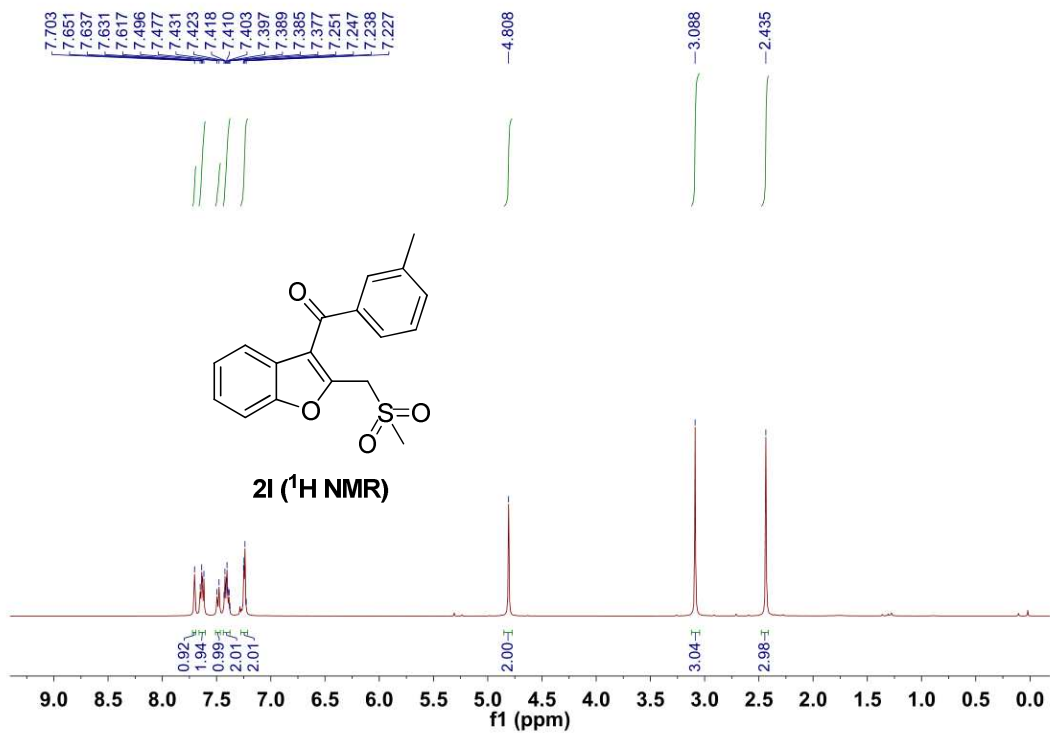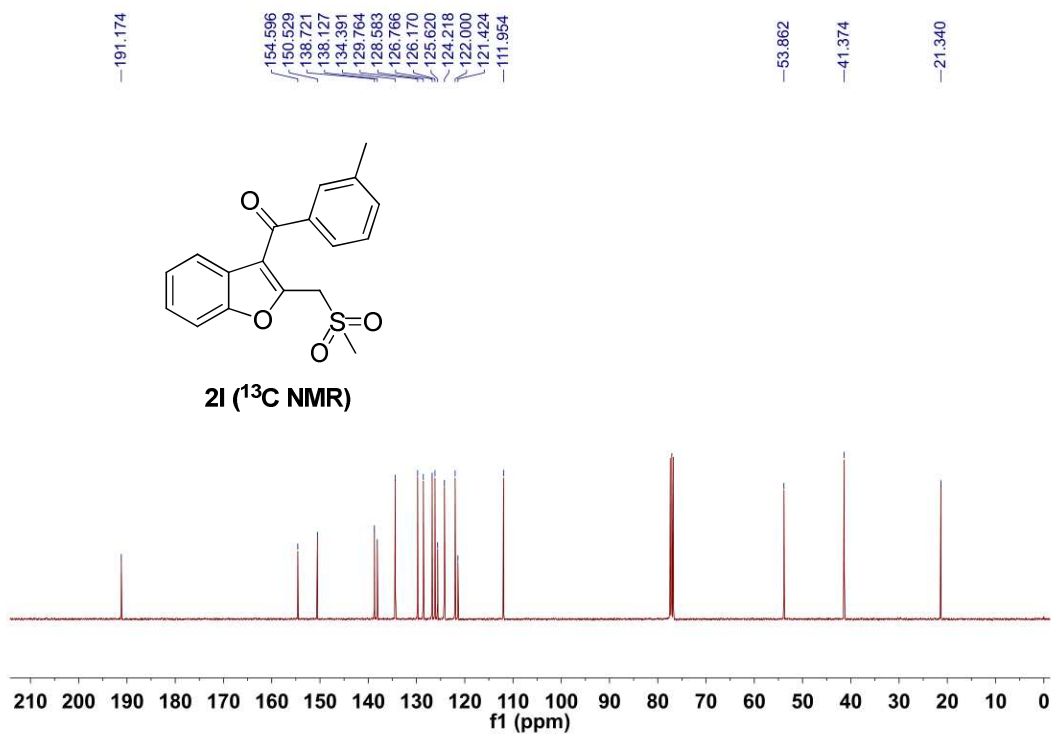



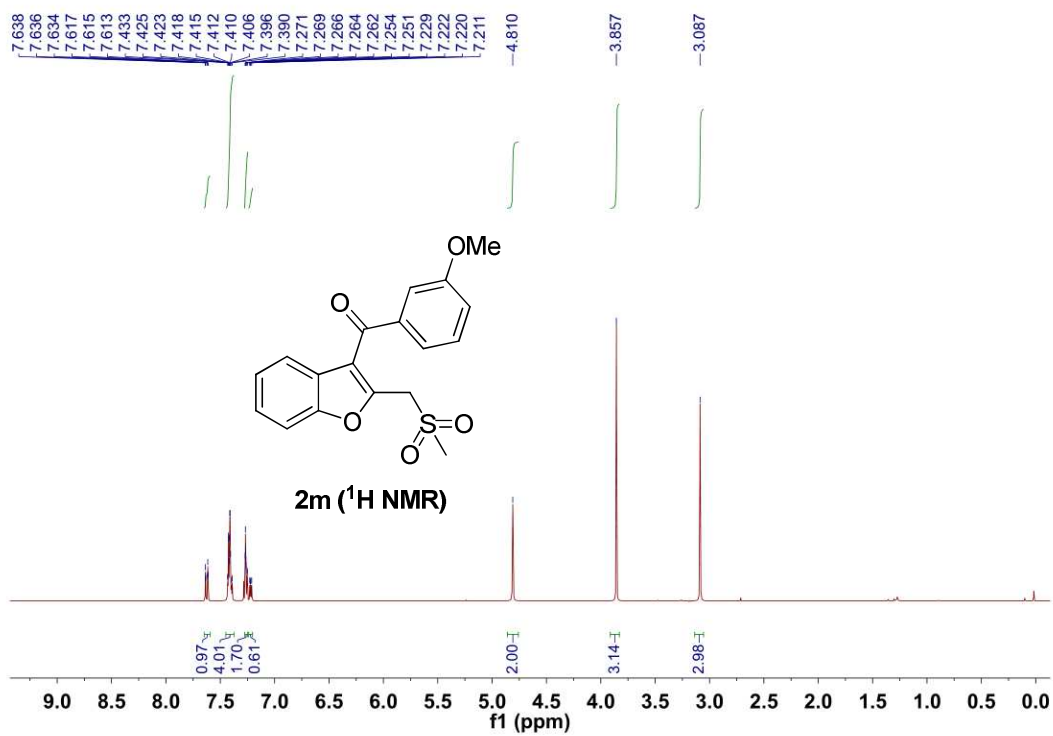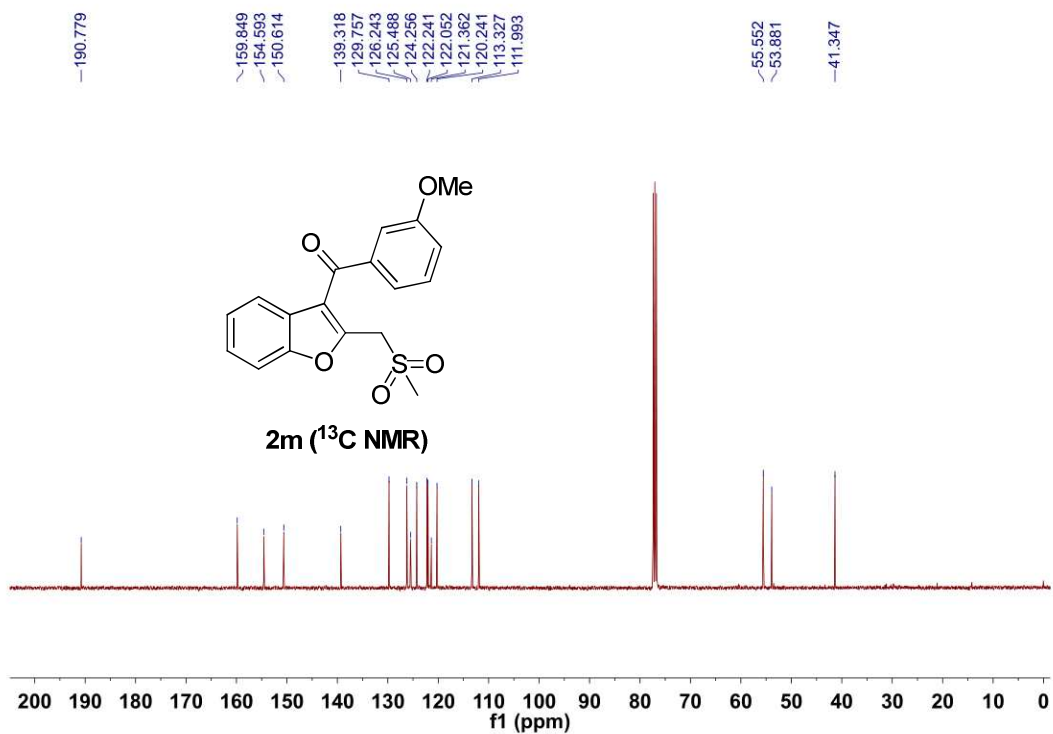

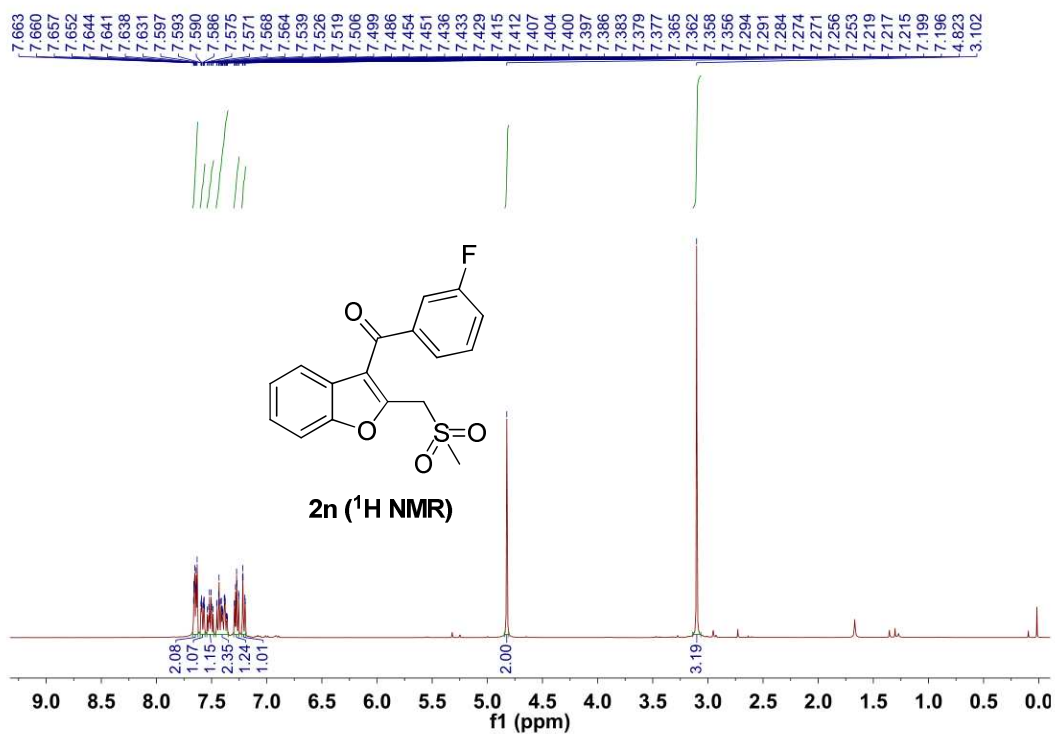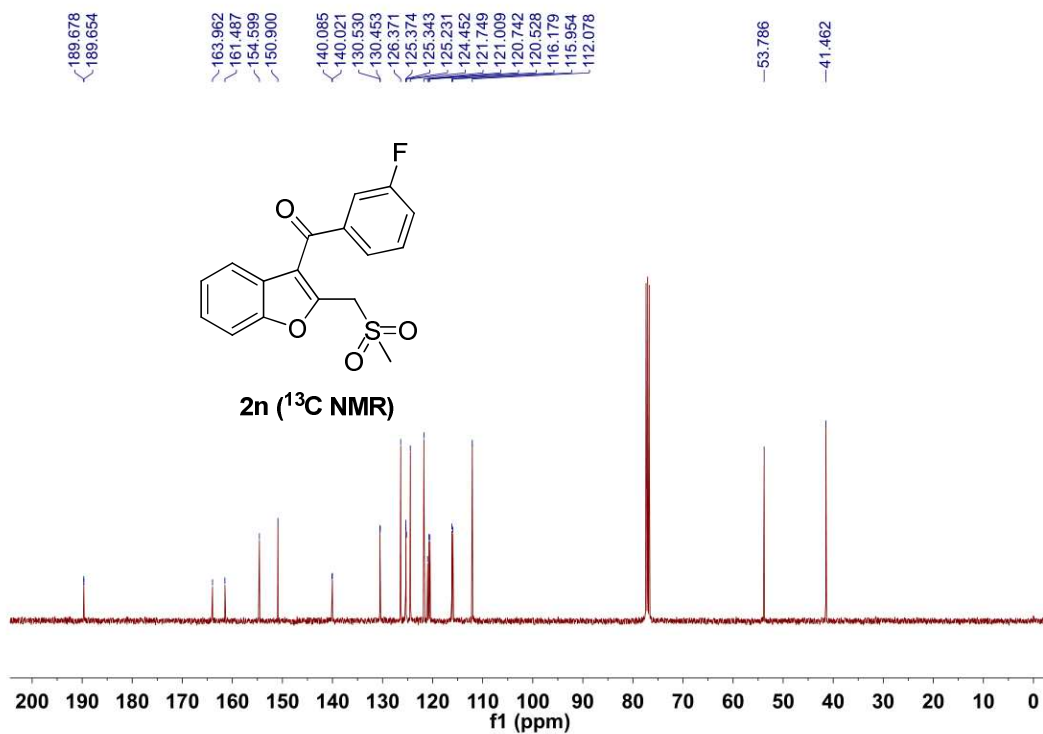

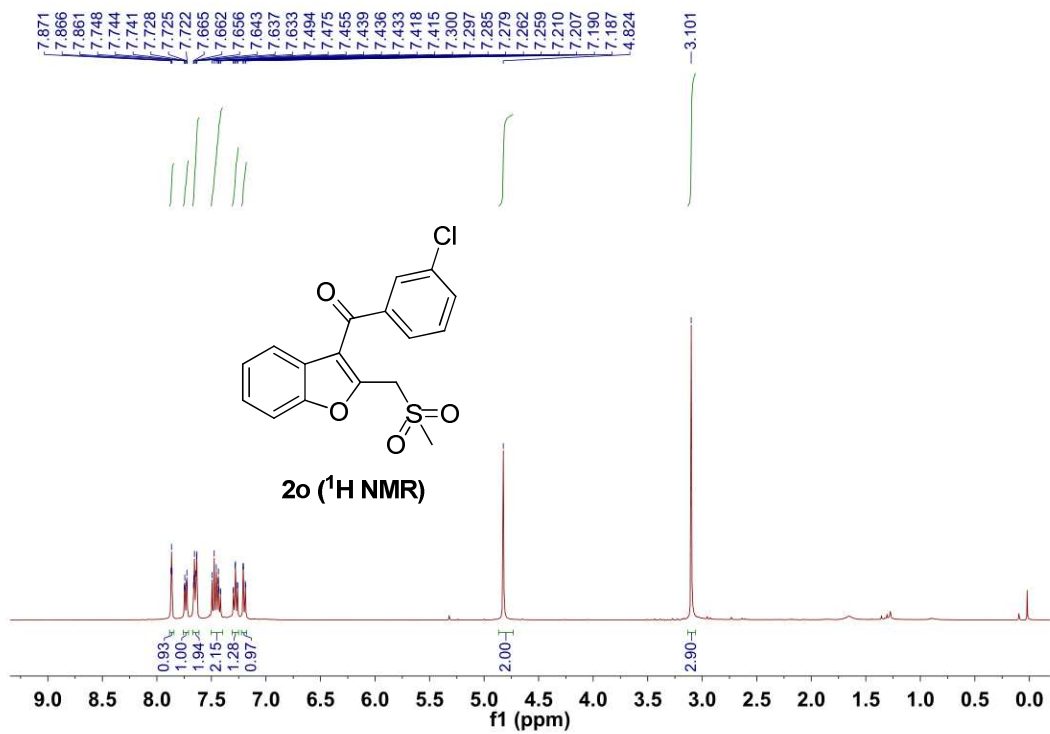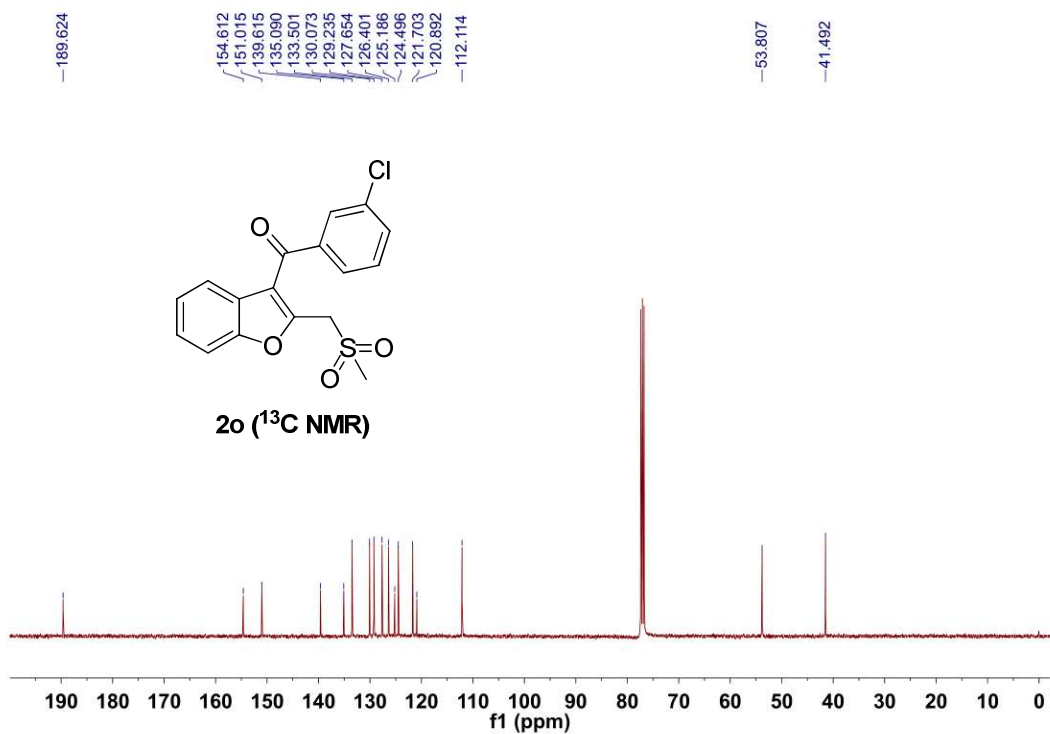

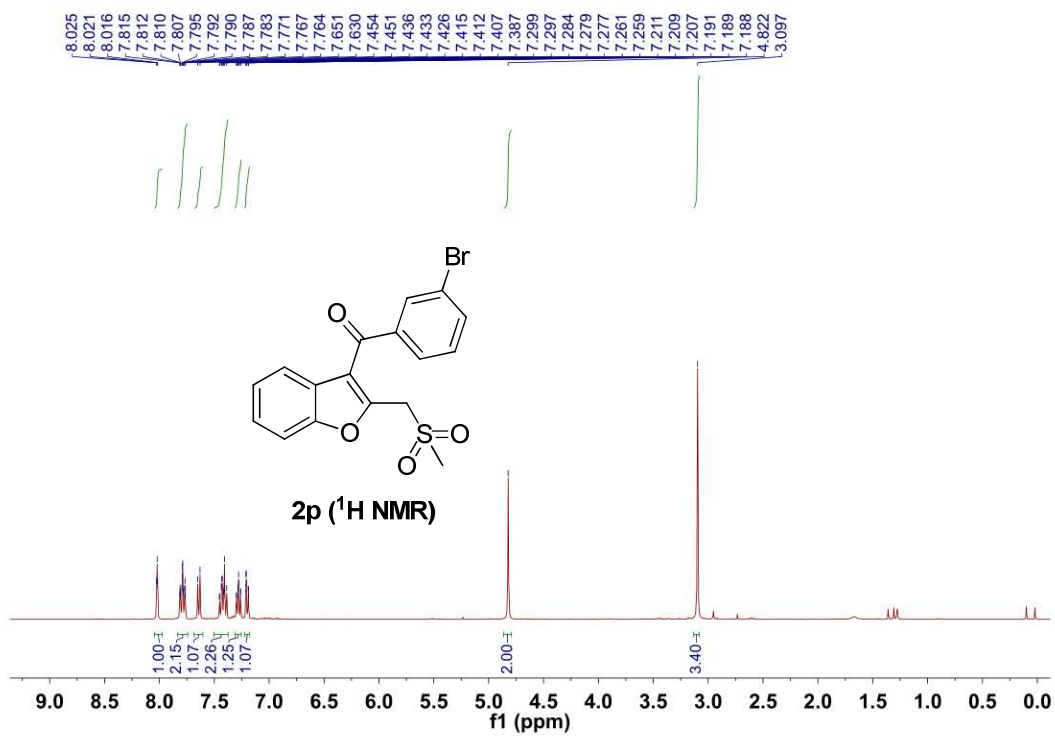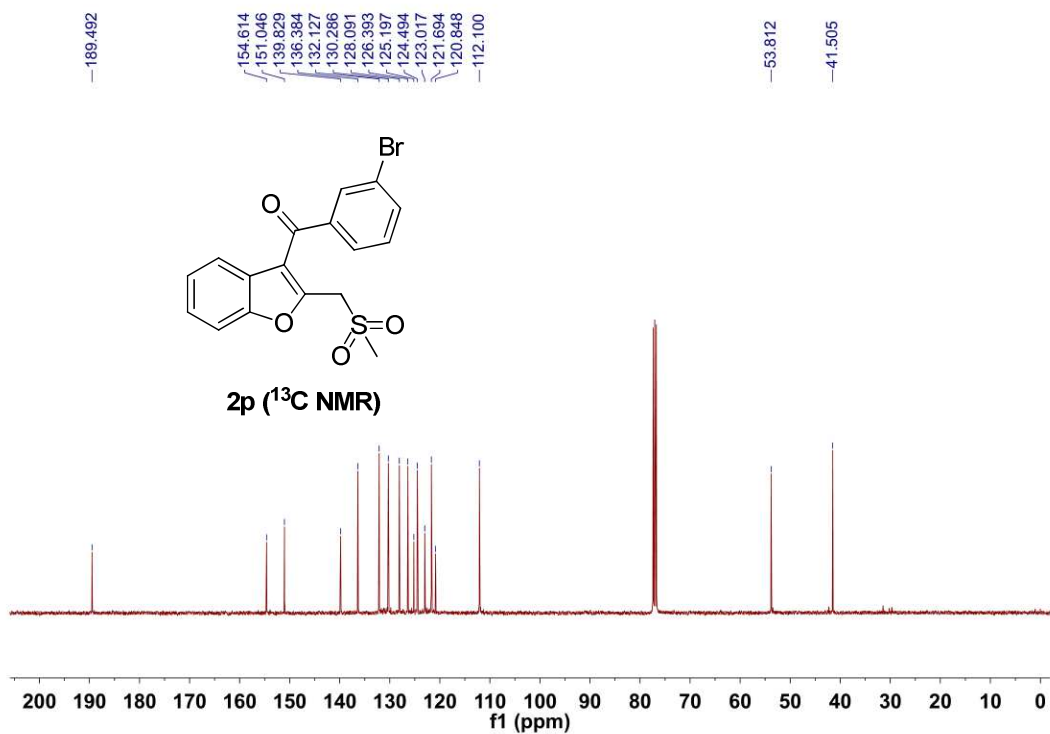

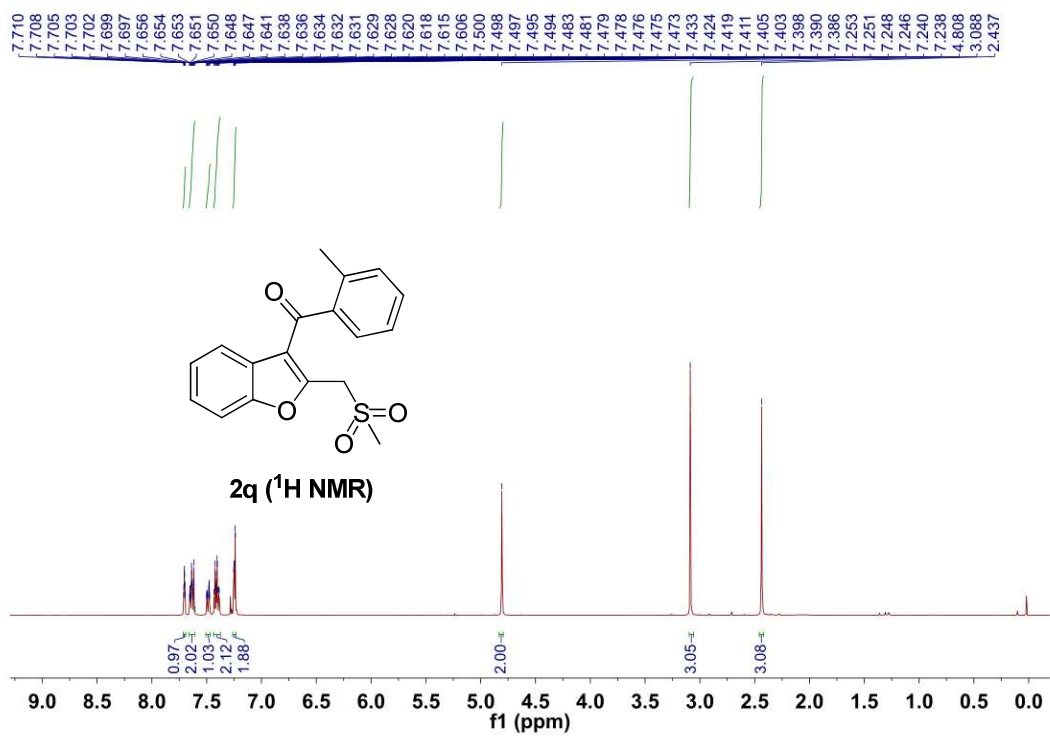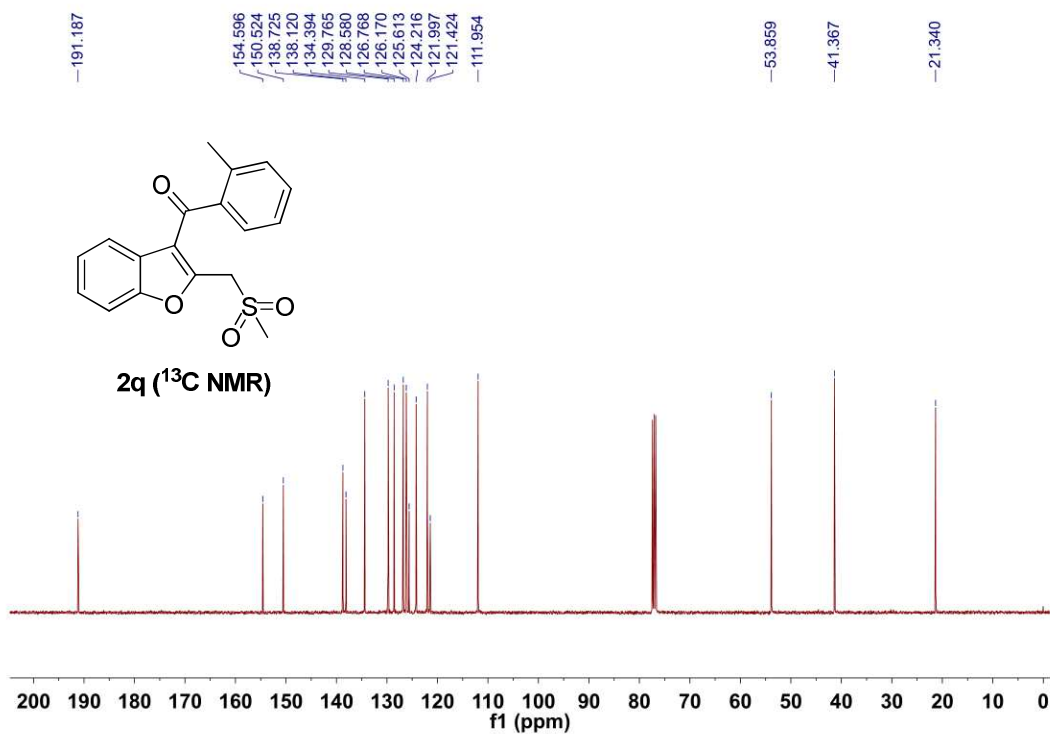

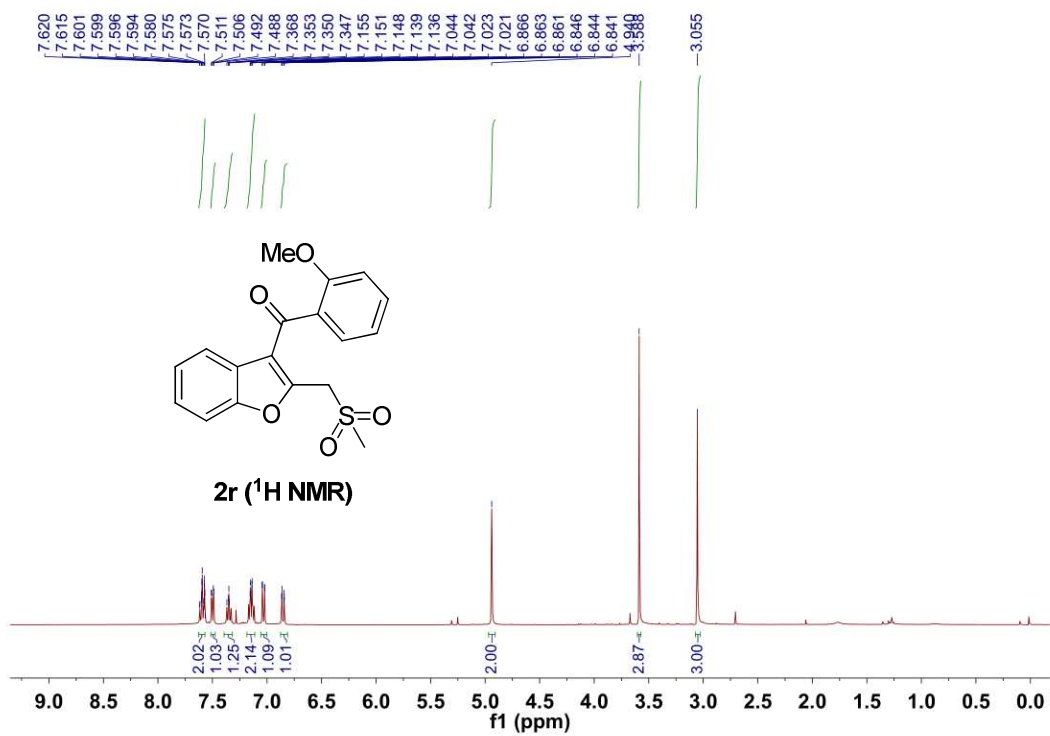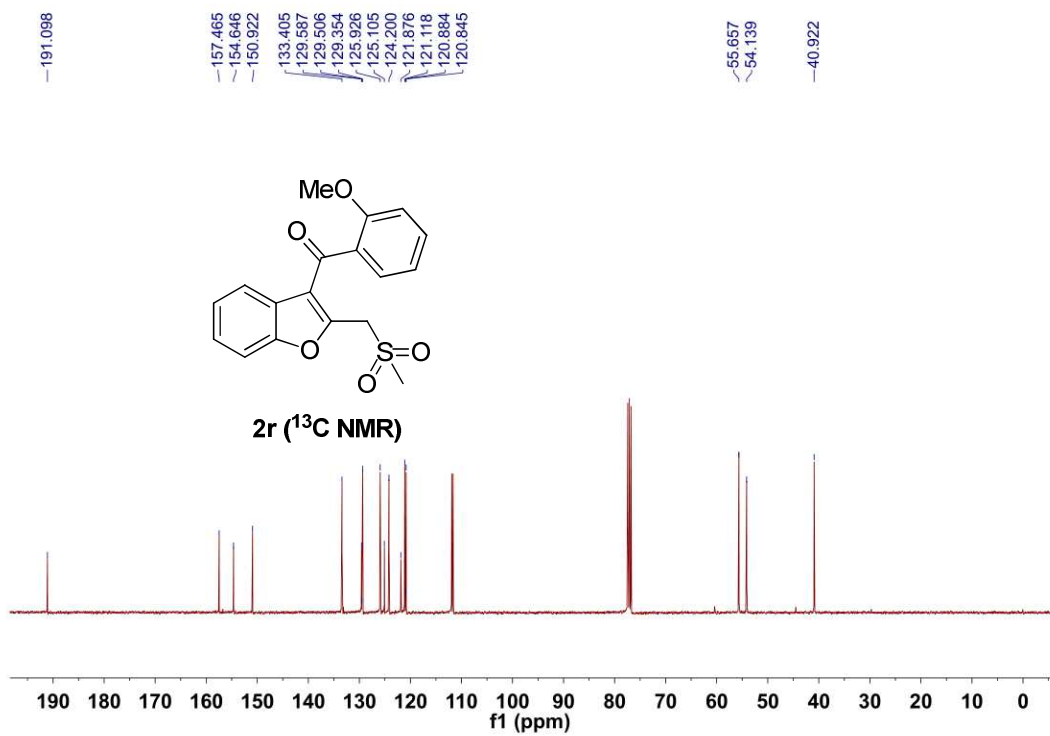

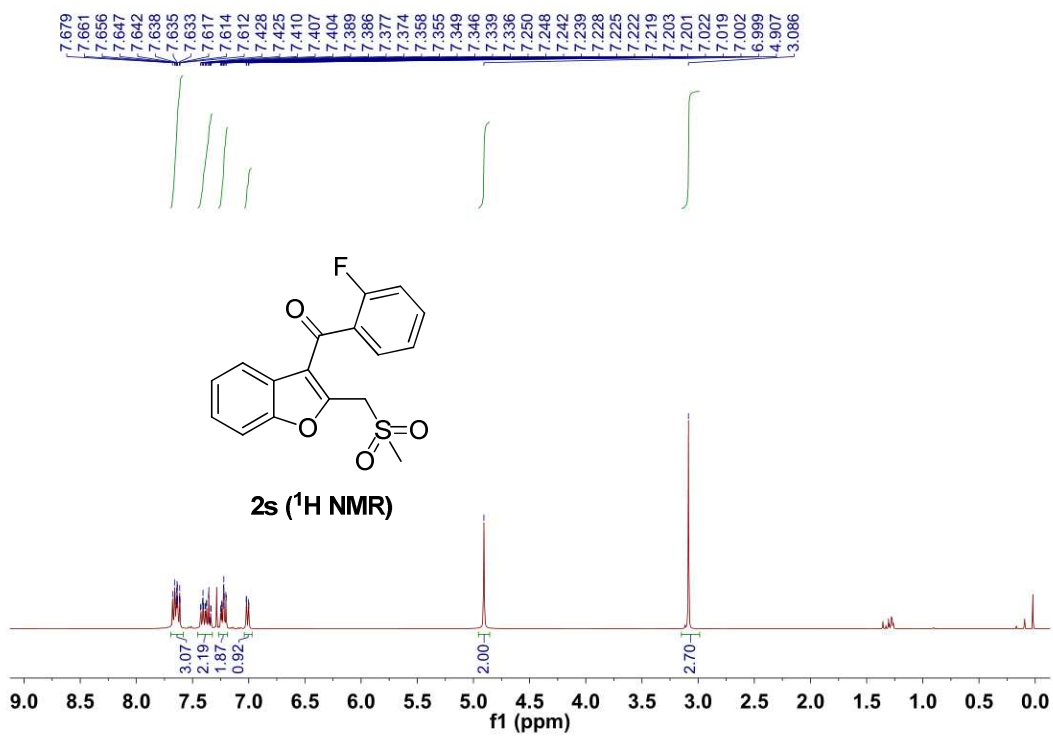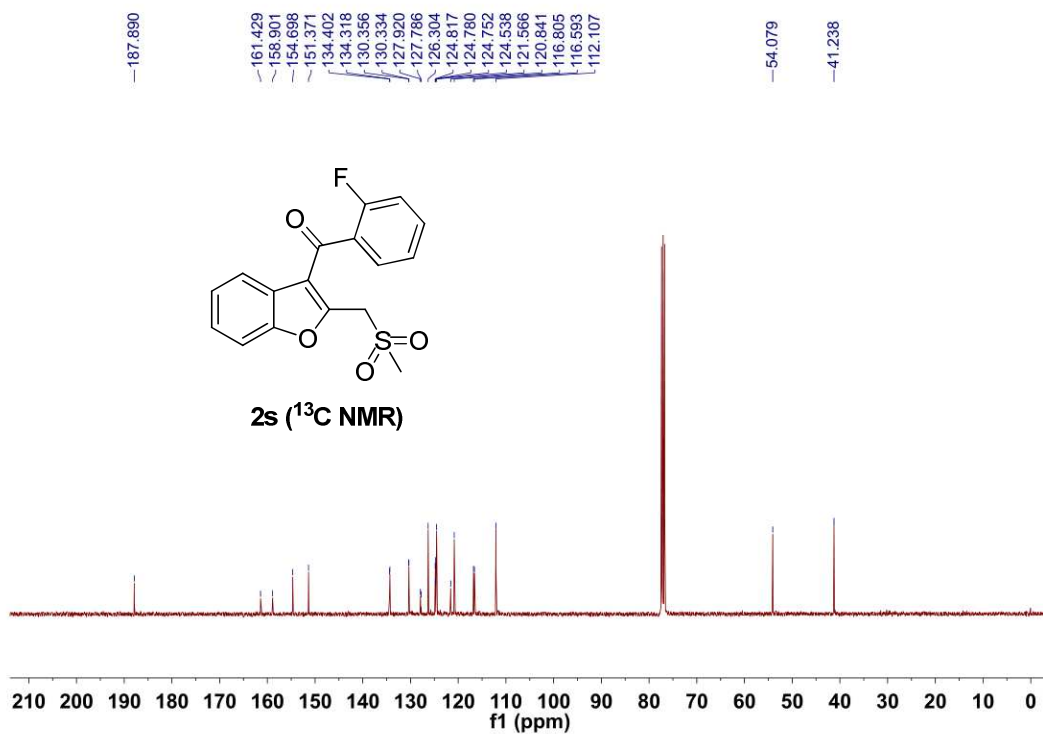

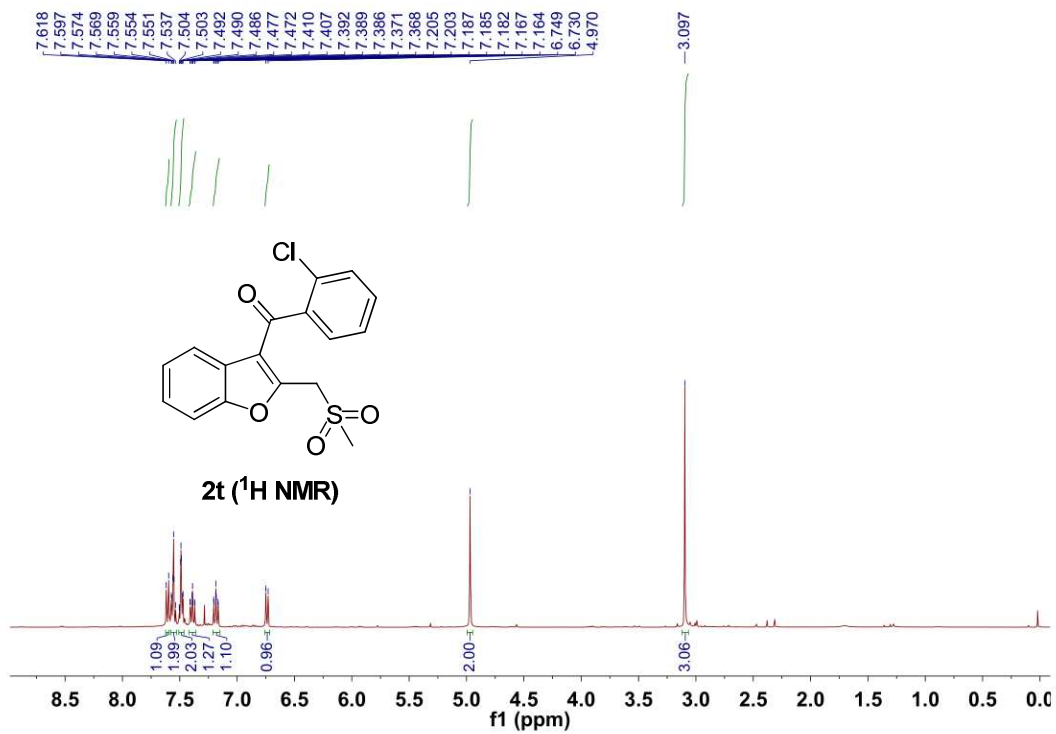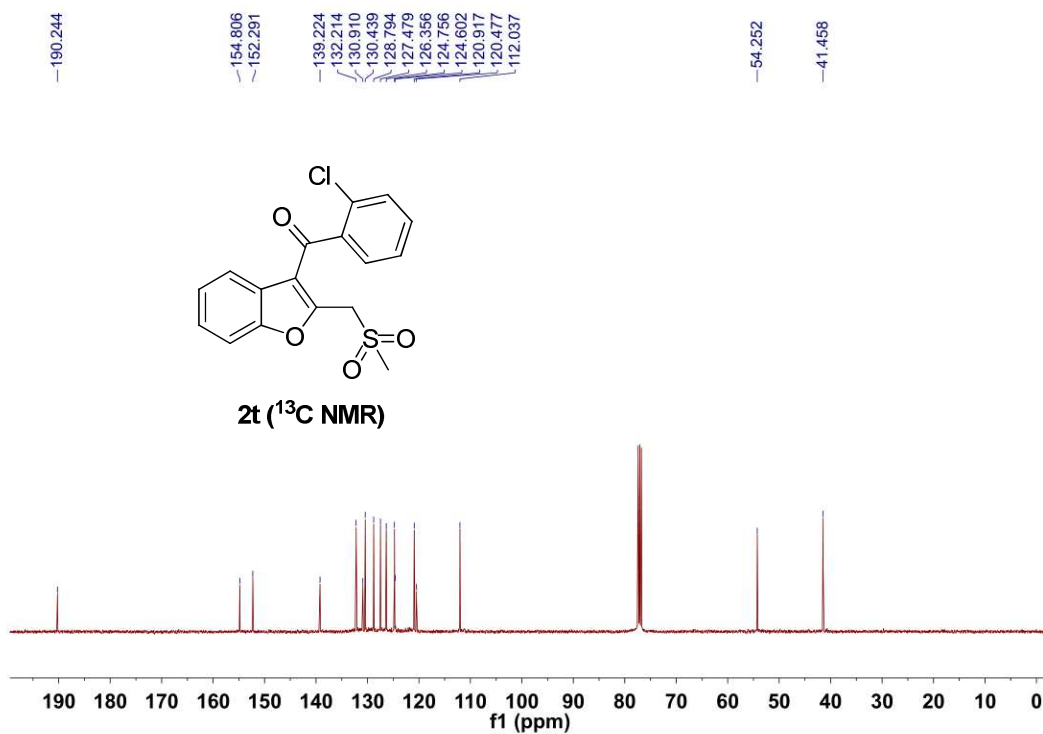



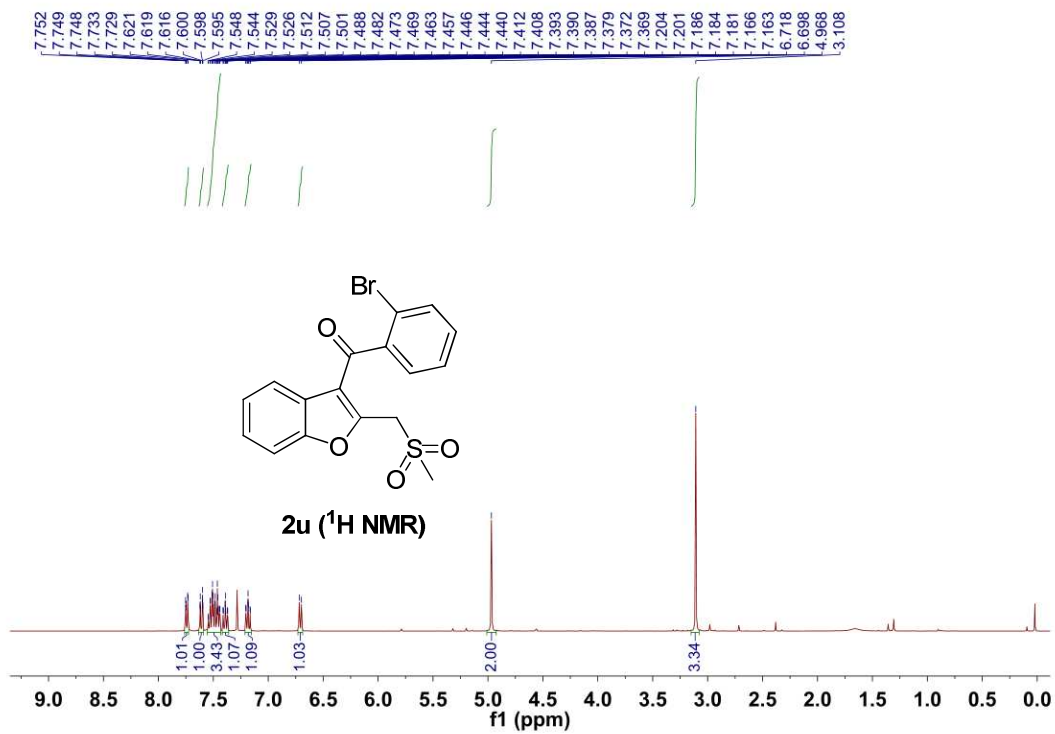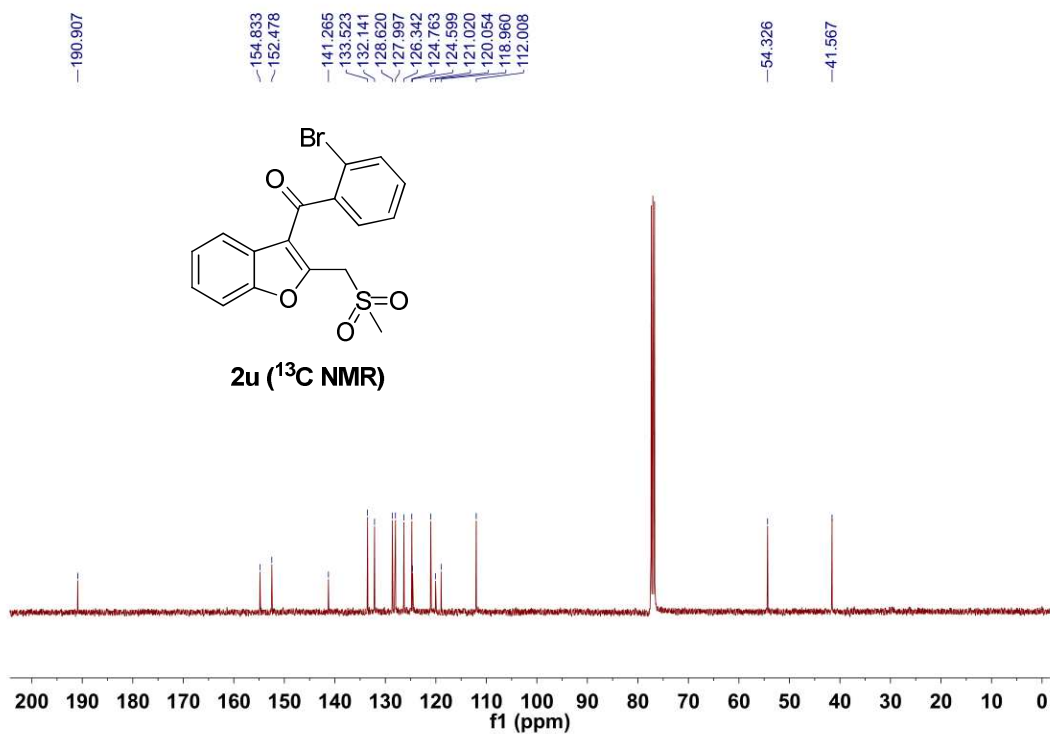

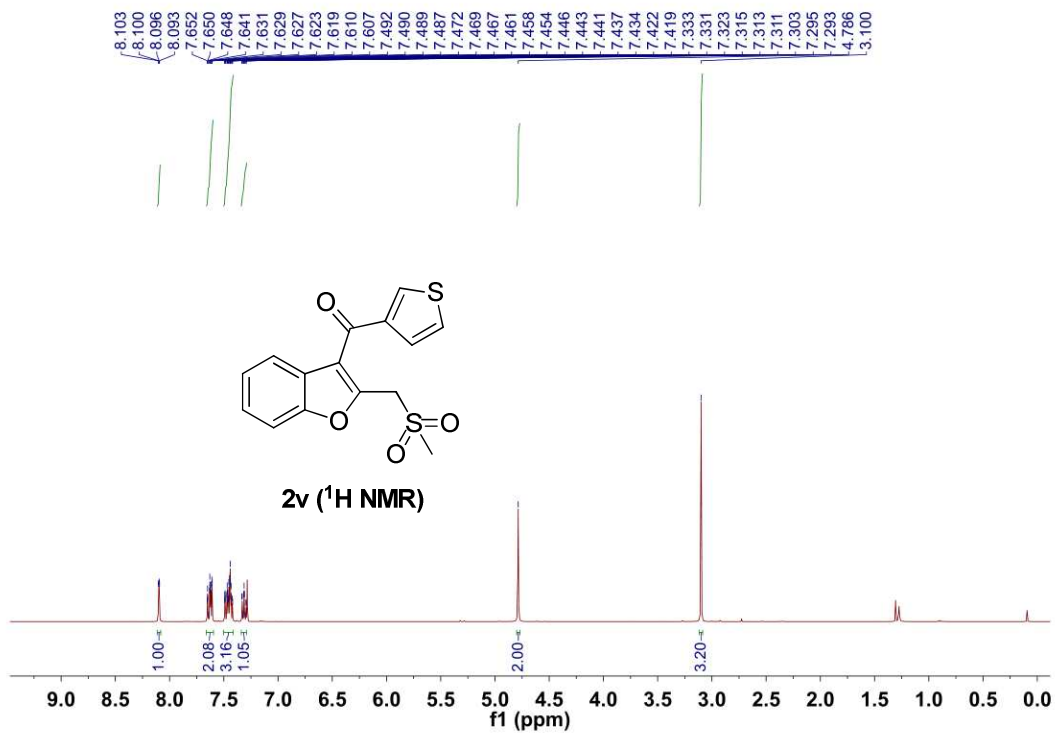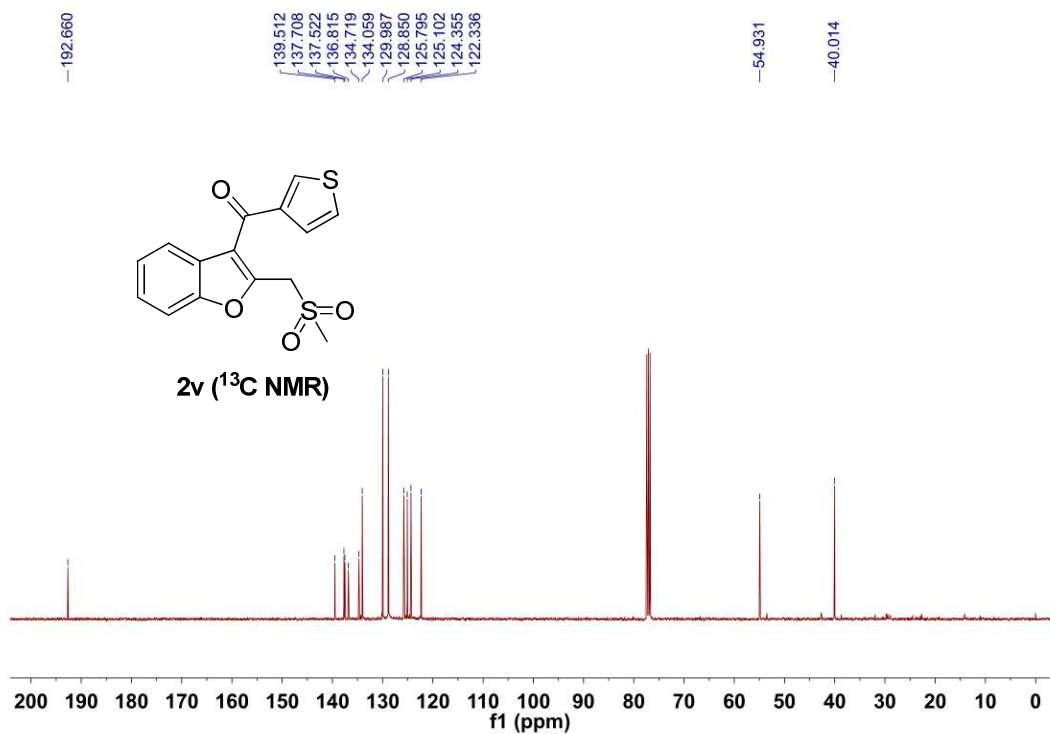

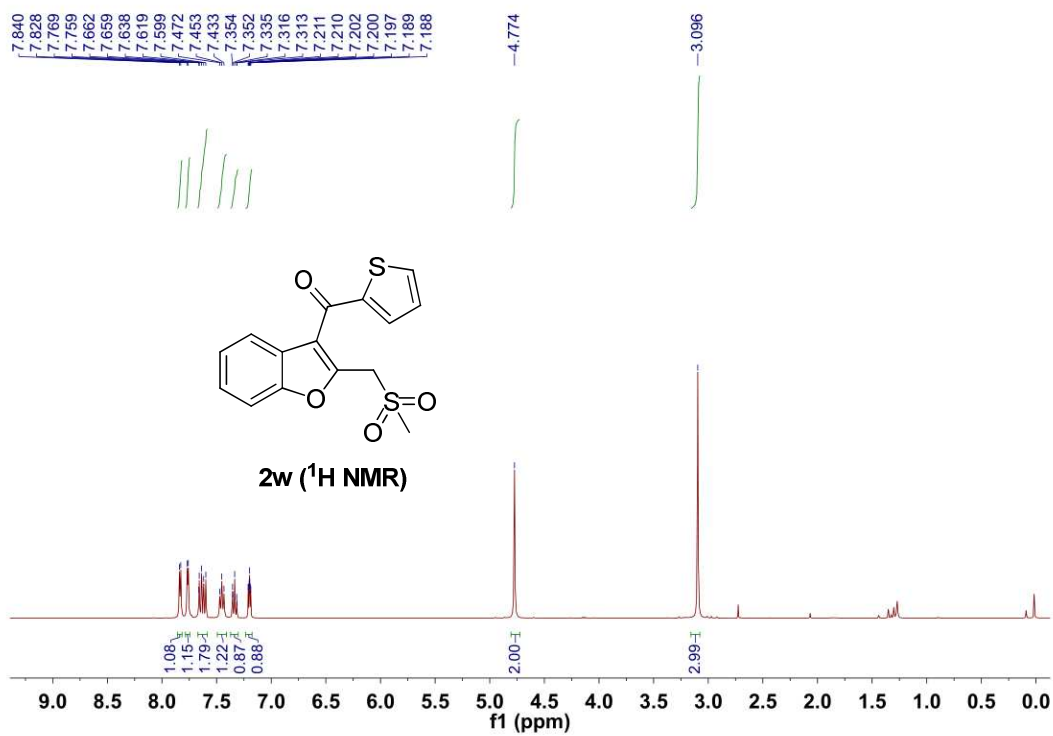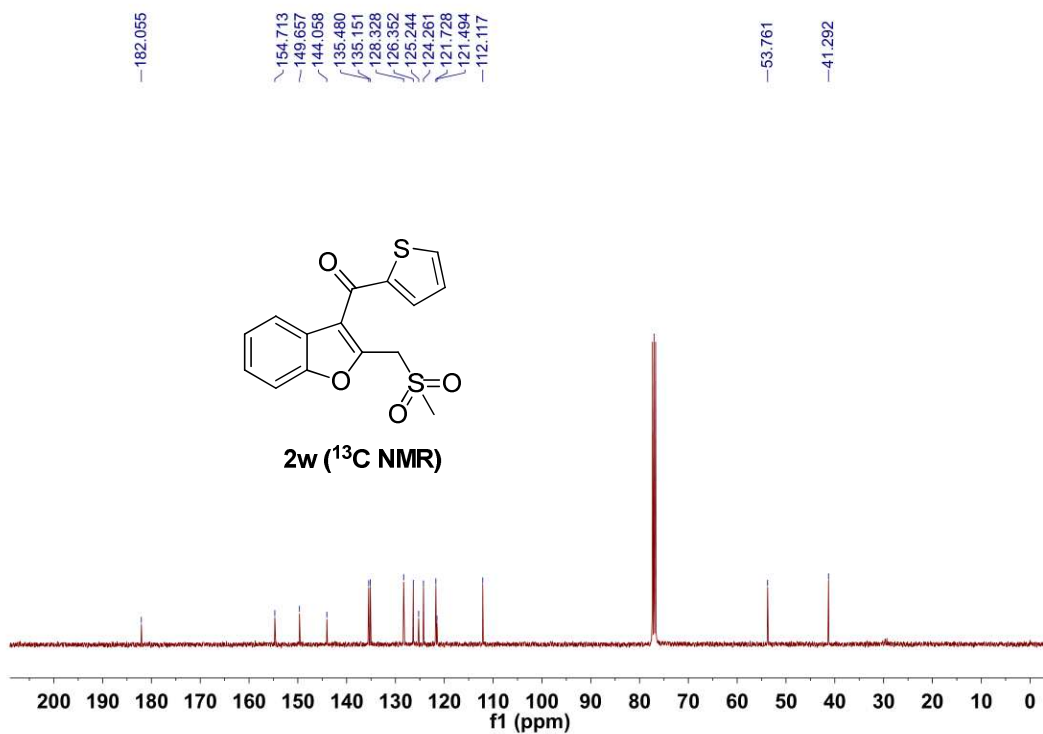

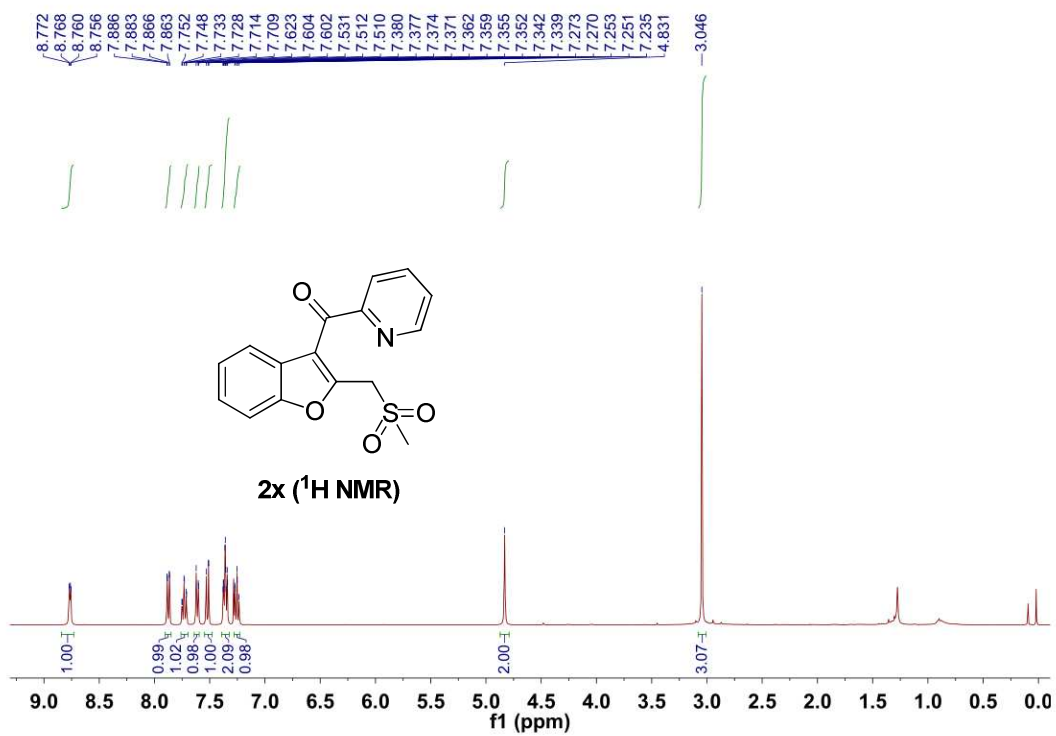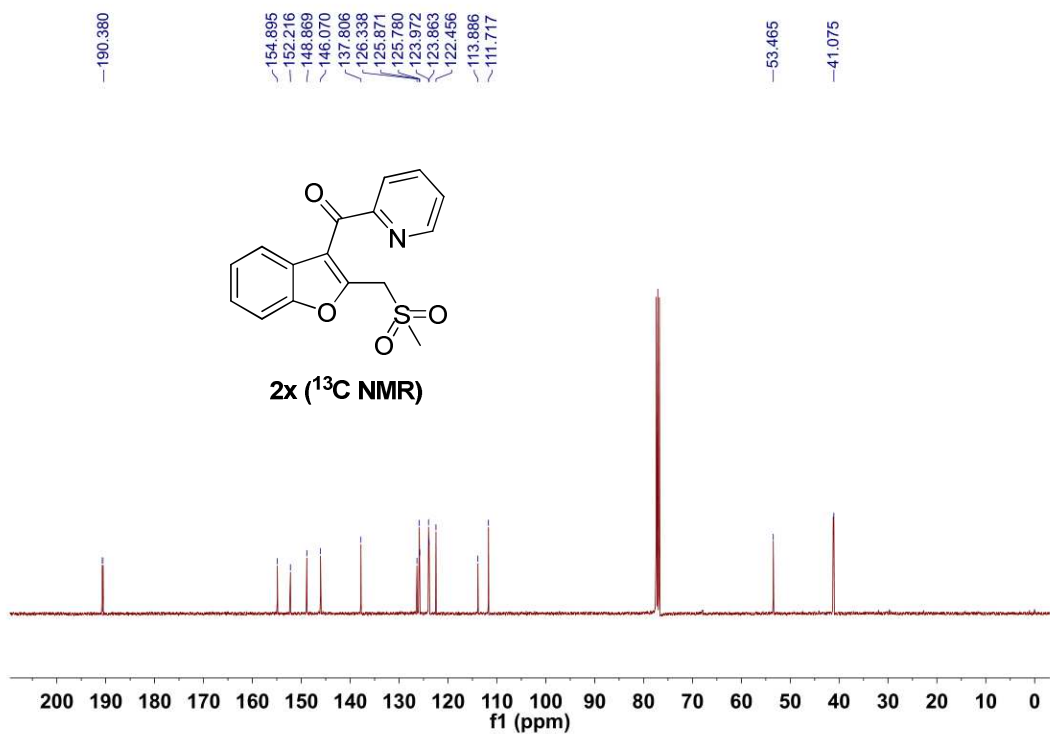

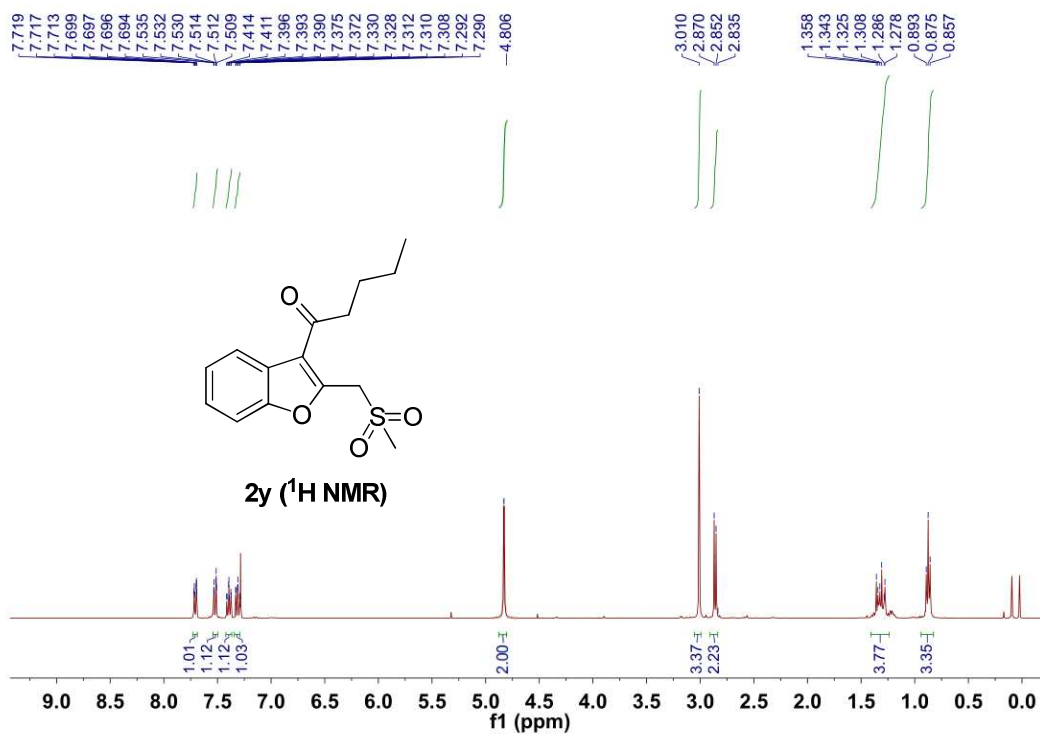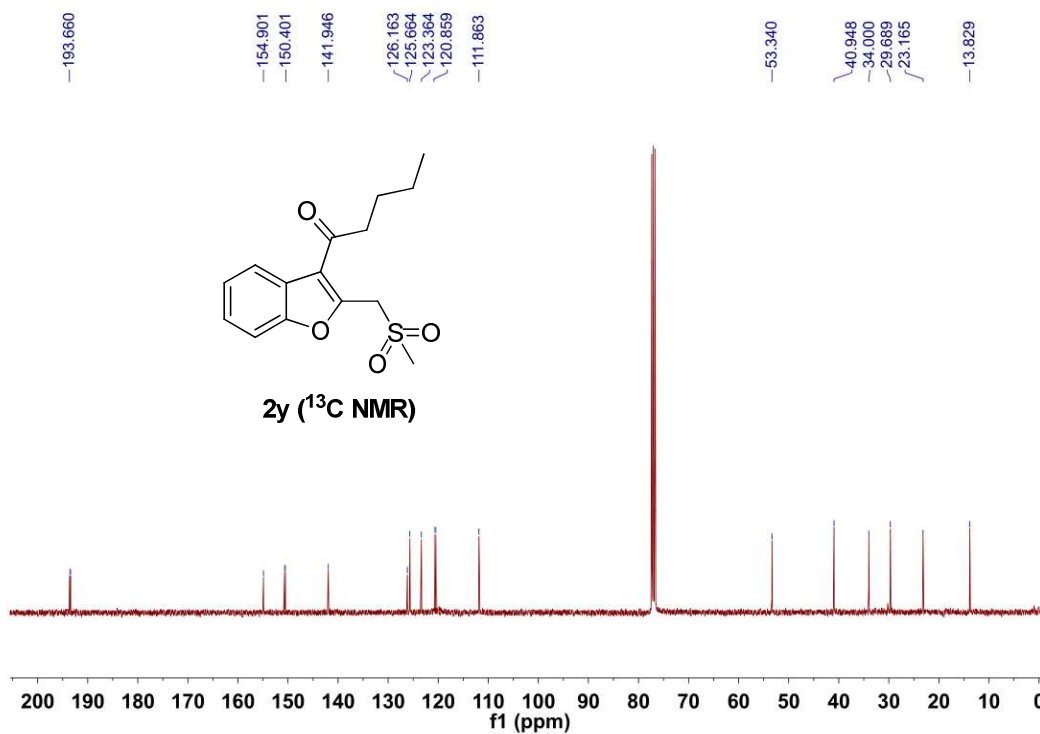

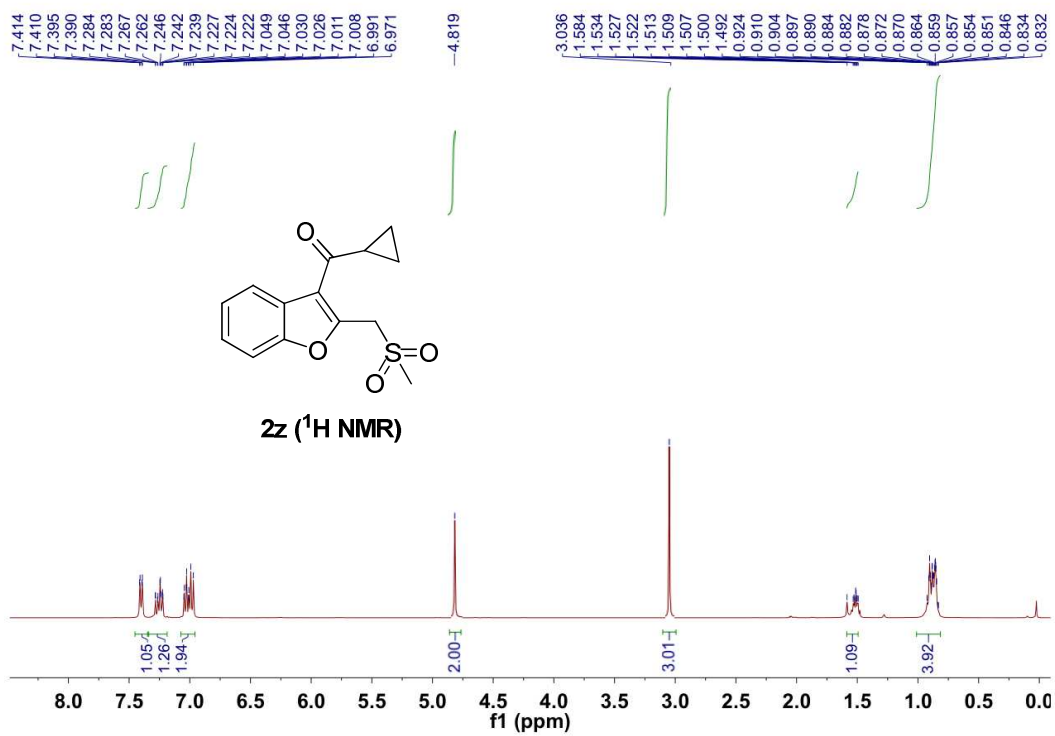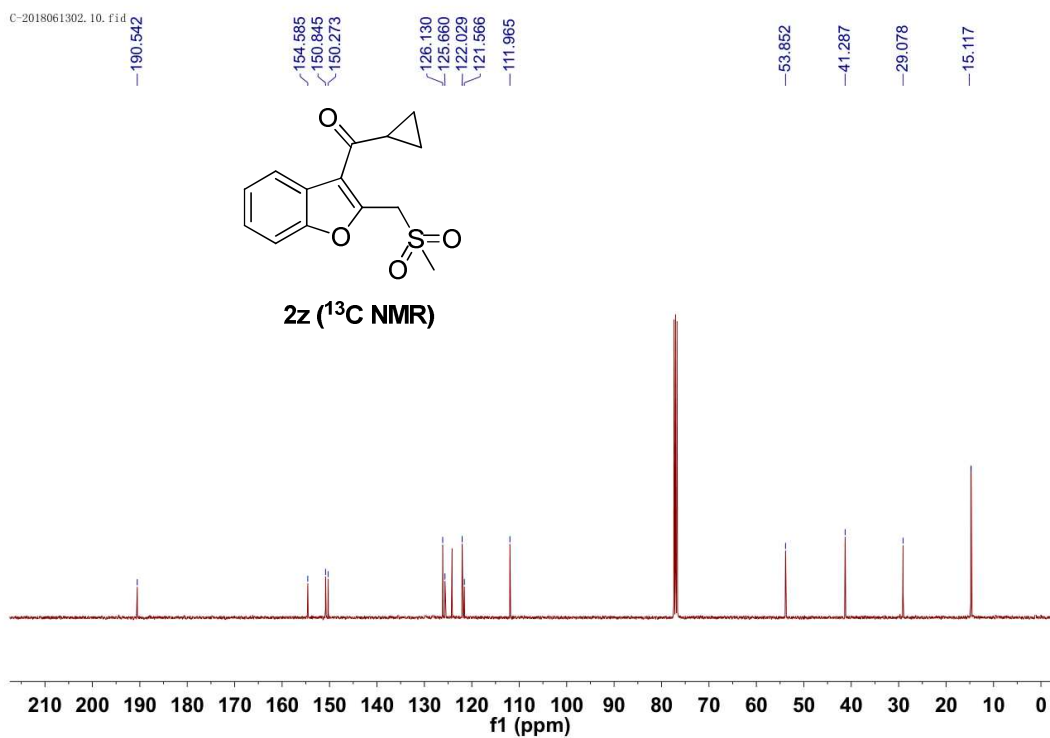

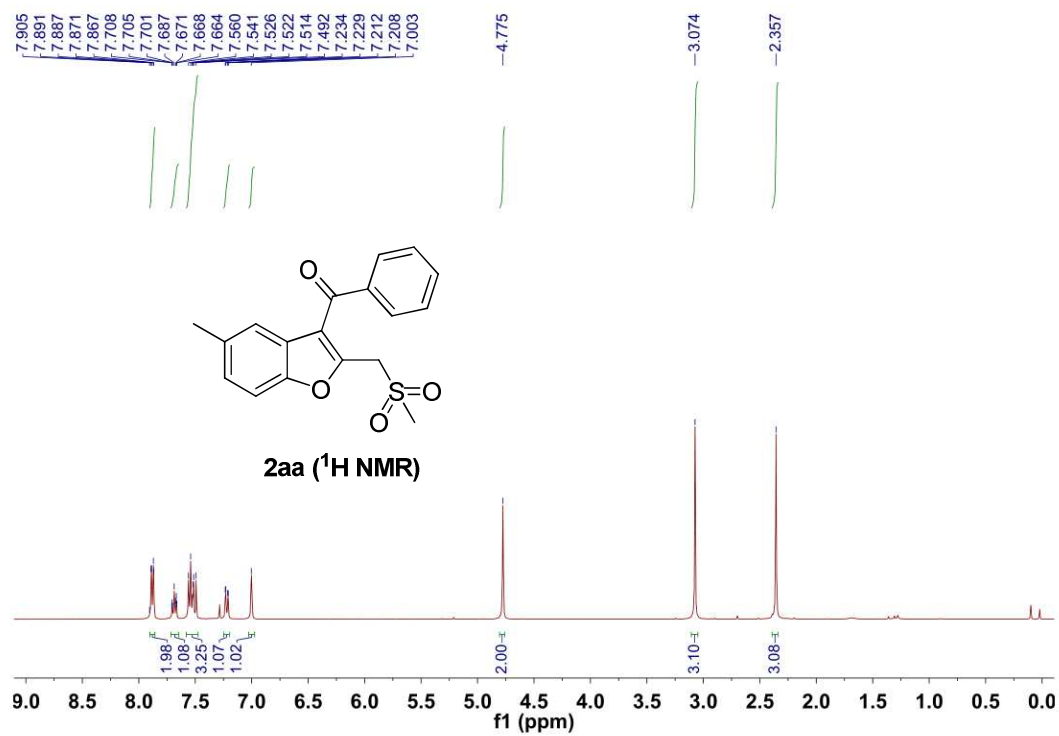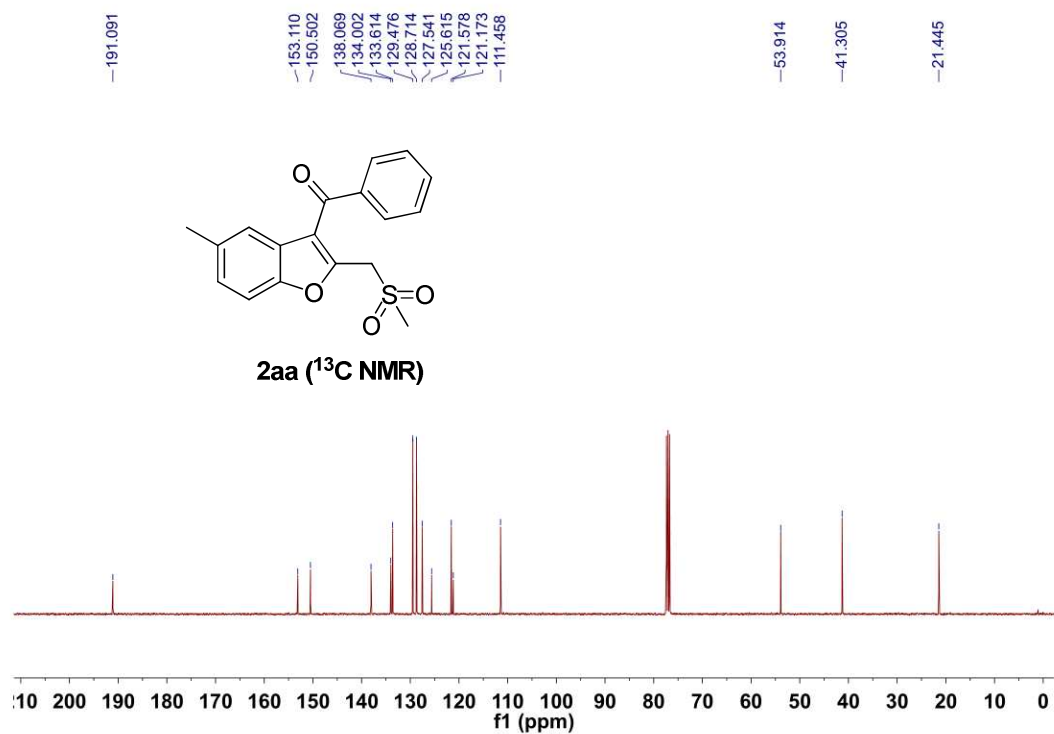

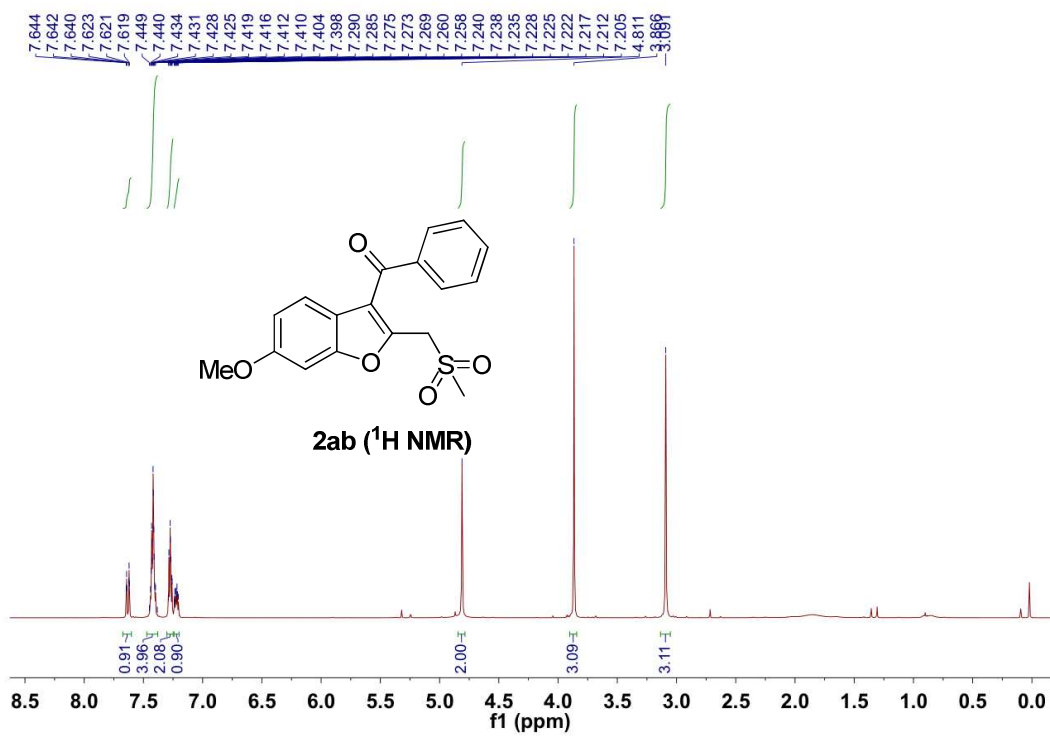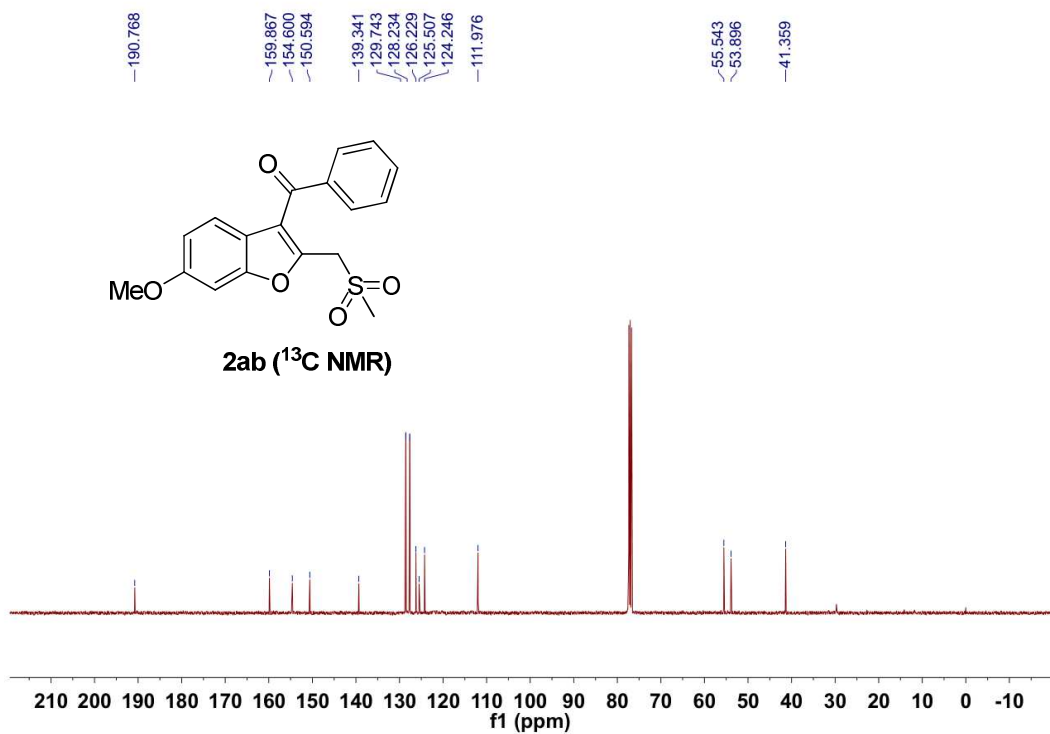



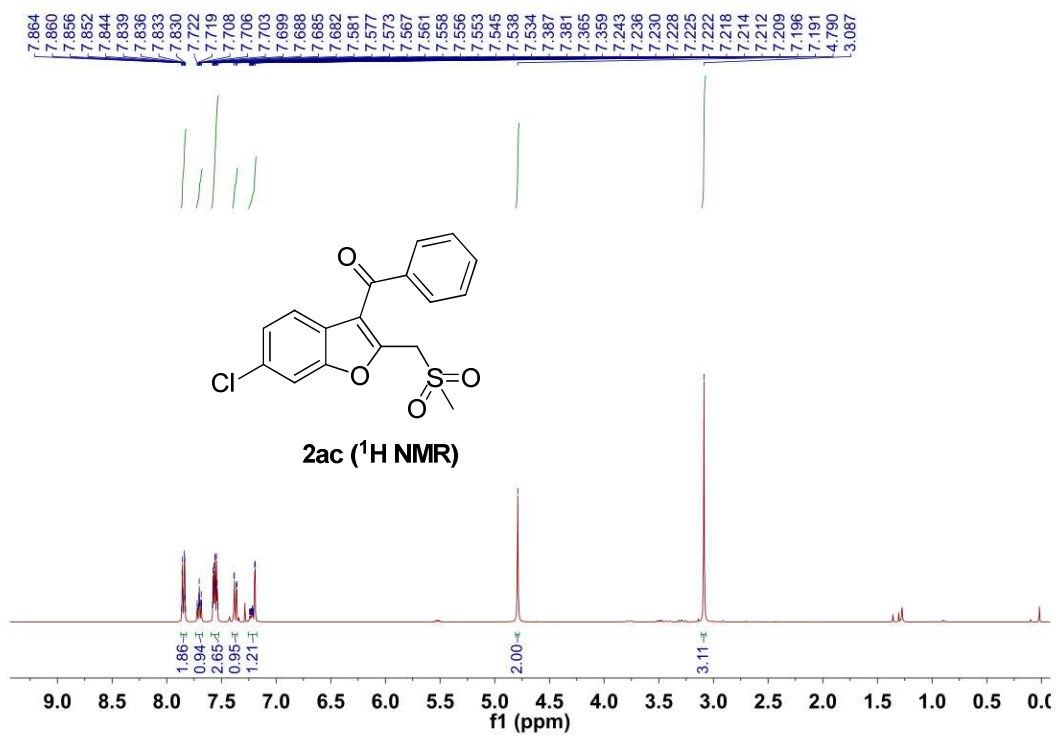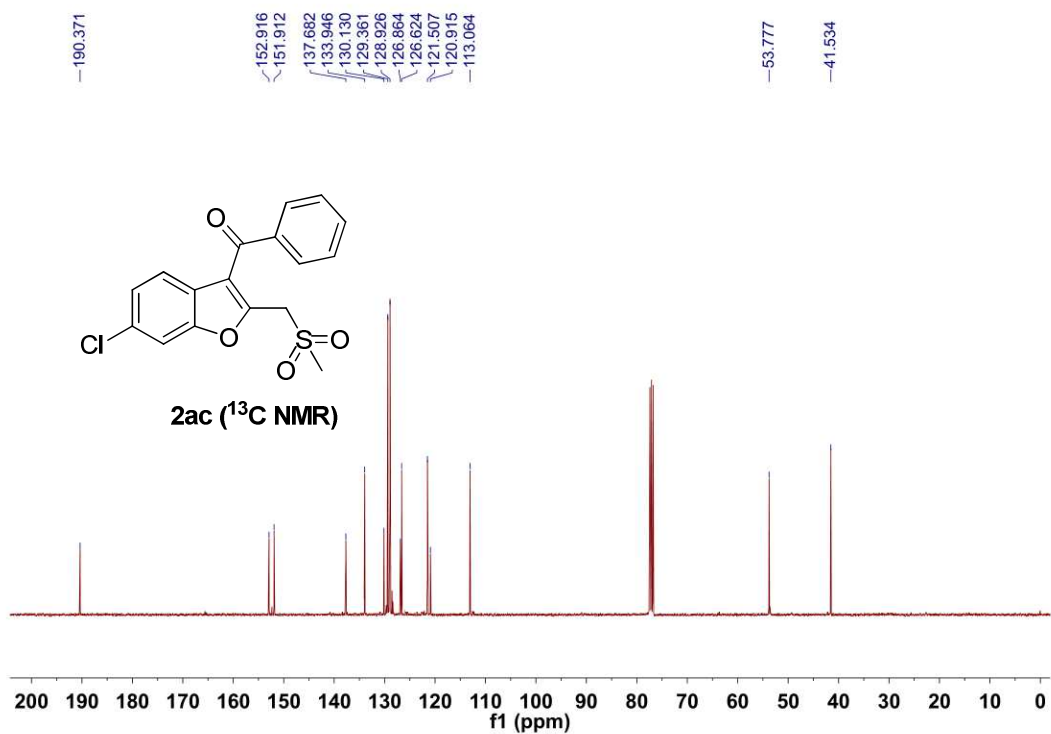

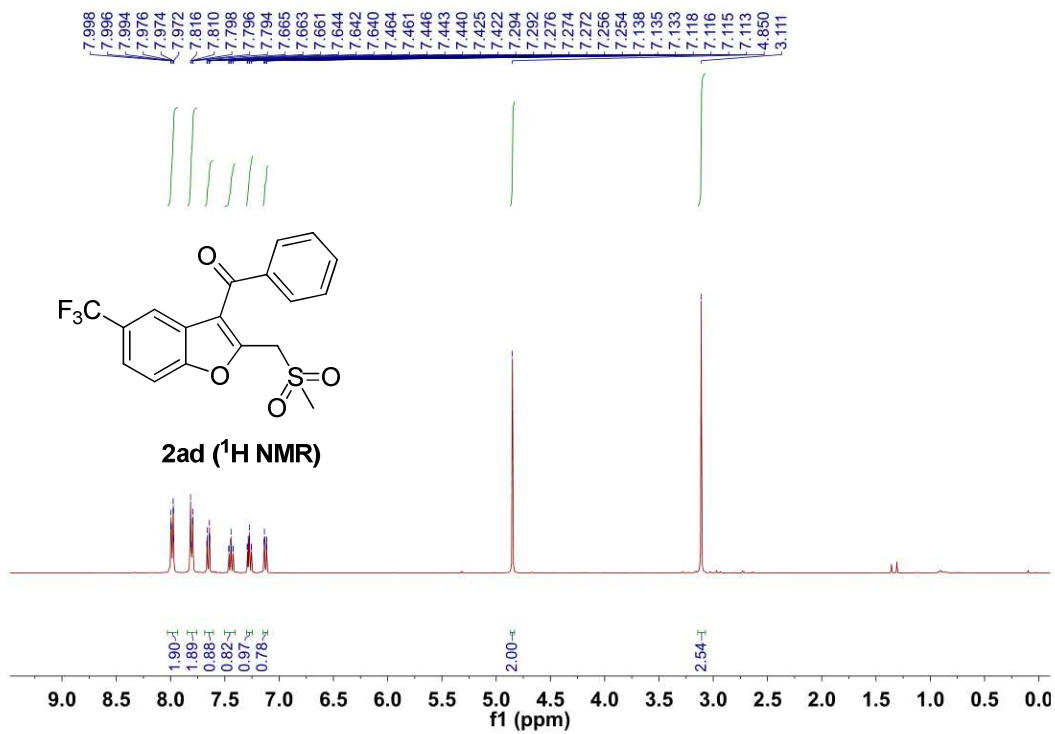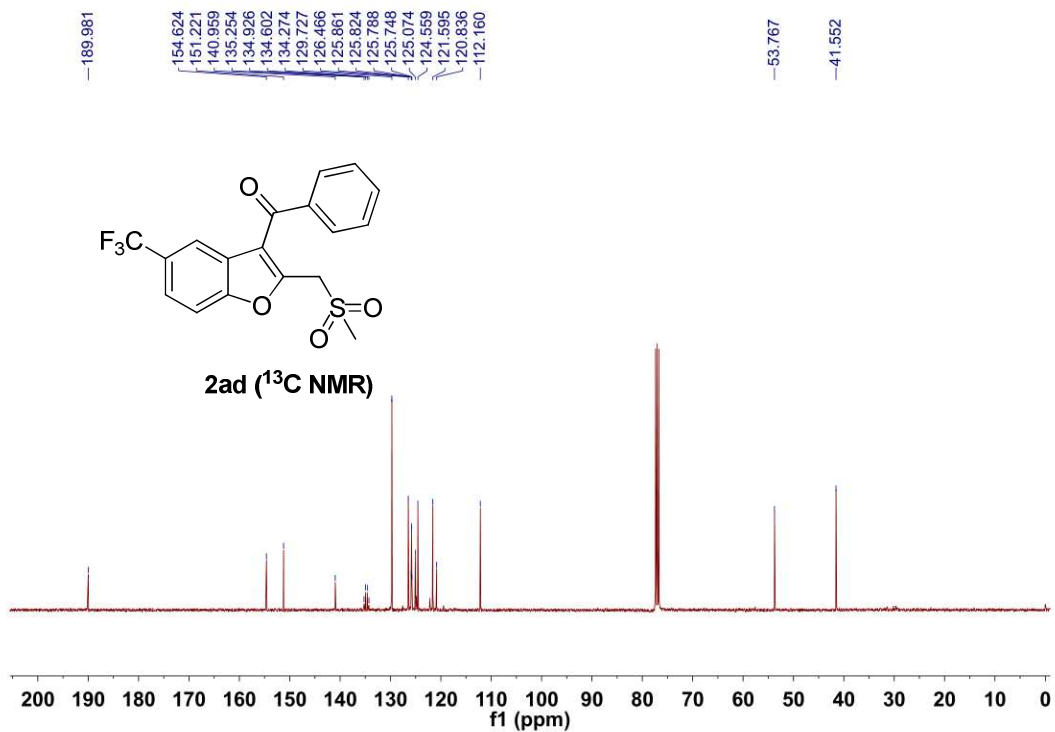

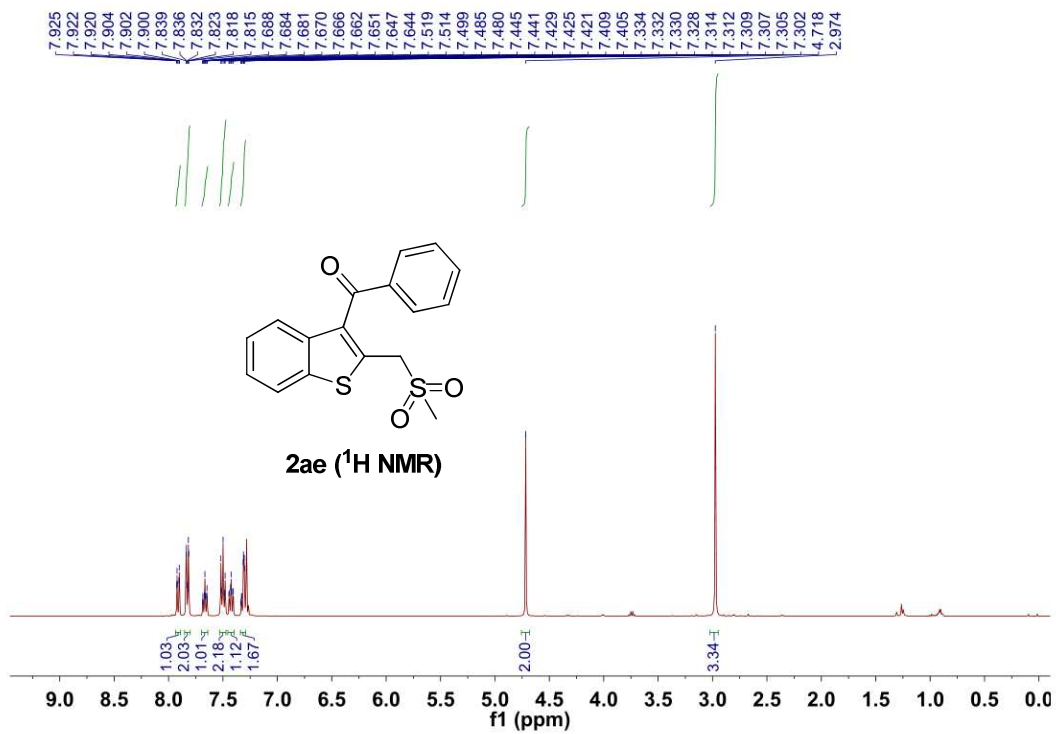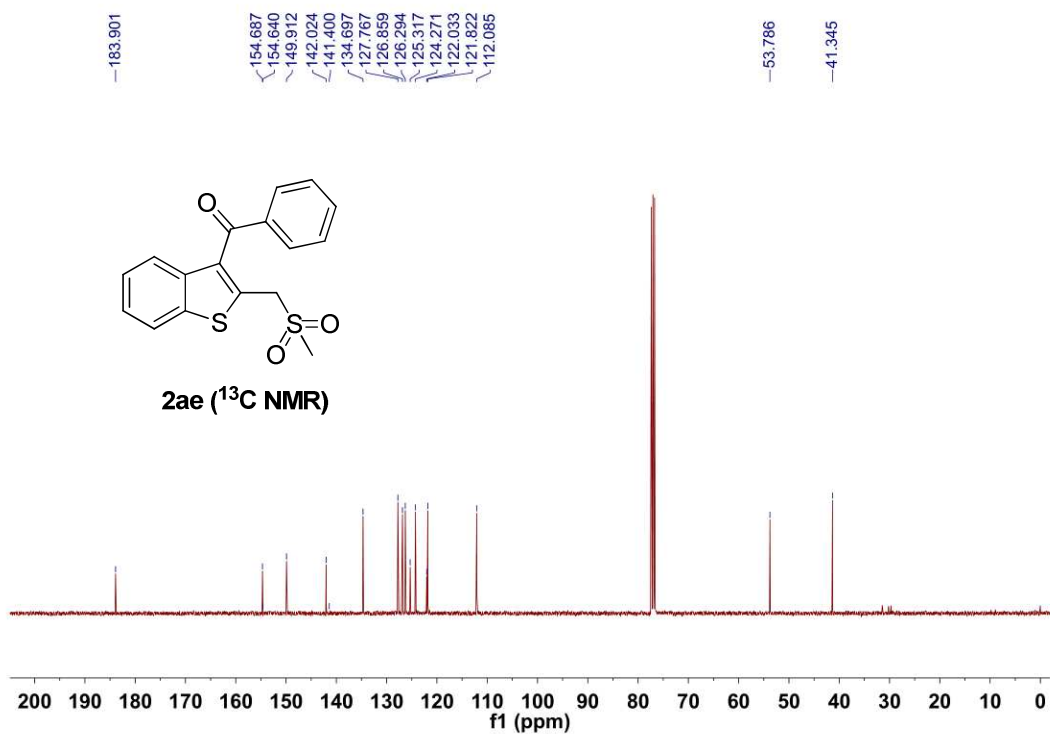

Supplement: Supplementary file 1 [file 12393560]
